# Supplementary material for: Conservation Strip Tillage Leads to Persistent Alterations in the Rhizosphere Microbiota of Brassica napus Crops
Source: Frontiers journal article supplement (doi:10.3389/fsoil.2021.659454), 2021-08-18
Supplement: Data_Sheet_1.xlsx [file Data_Sheet_1.xlsx]

## Sheet: Experiment Design
#SampleID	BarcodeSequence	LinkerPrimerSequence	ReversePrimer	TimePoint	Compartments	Tillage	Description
Bn3	AGGCAGAAGCGTAAGA	CCTACGGGNGGCWGCAG	GACTACHVGGGTATCTAATCC	Vegetative	Rhizosphere	Conservation	VegRzConservation
Bn4	TCCTGAGCGCGTAAGA	CCTACGGGNGGCWGCAG	GACTACHVGGGTATCTAATCC	Vegetative	Bulk	Conservation	VegBkConservation
Bn7	CTCTCTACGCGTAAGA	CCTACGGGNGGCWGCAG	GACTACHVGGGTATCTAATCC	Vegetative	Rhizosphere	Conservation	VegRzConservation
Bn8	CAGAGAGGGCGTAAGA	CCTACGGGNGGCWGCAG	GACTACHVGGGTATCTAATCC	Vegetative	Bulk	Conservation	VegBkConservation
Bn11	AAGAGGCAGCGTAAGA	CCTACGGGNGGCWGCAG	GACTACHVGGGTATCTAATCC	Vegetative	Rhizosphere	Conservation	VegRzConservation
Bn12	GTAGAGGAGCGTAAGA	CCTACGGGNGGCWGCAG	GACTACHVGGGTATCTAATCC	Vegetative	Bulk	Conservation	VegBkConservation
Bn15	AGGCAGAACTCTCTAT	CCTACGGGNGGCWGCAG	GACTACHVGGGTATCTAATCC	Flowering	Rhizosphere	Conservation	FlRzConservation
Bn16	TCCTGAGCCTCTCTAT	CCTACGGGNGGCWGCAG	GACTACHVGGGTATCTAATCC	Flowering	Bulk	Conservation	FlBkConservation
Bn19	CTCTCTACCTCTCTAT	CCTACGGGNGGCWGCAG	GACTACHVGGGTATCTAATCC	Flowering	Rhizosphere	Conservation	FlRzConservation
Bn20	CAGAGAGGCTCTCTAT	CCTACGGGNGGCWGCAG	GACTACHVGGGTATCTAATCC	Flowering	Bulk	Conservation	FlBkConservation
Bn23	AAGAGGCACTCTCTAT	CCTACGGGNGGCWGCAG	GACTACHVGGGTATCTAATCC	Flowering	Rhizosphere	Conservation	FlRzConservation
Bn24	GTAGAGGACTCTCTAT	CCTACGGGNGGCWGCAG	GACTACHVGGGTATCTAATCC	Flowering	Bulk	Conservation	FlBkConservation
Bn27	AGGCAGAATATCCTCT	CCTACGGGNGGCWGCAG	GACTACHVGGGTATCTAATCC	Harvesting	Rhizosphere	Conservation	HvRzConservation
Bn28	TCCTGAGCTATCCTCT	CCTACGGGNGGCWGCAG	GACTACHVGGGTATCTAATCC	Harvesting	Bulk	Conservation	HvBkConservation
Bn31	CTCTCTACTATCCTCT	CCTACGGGNGGCWGCAG	GACTACHVGGGTATCTAATCC	Harvesting	Rhizosphere	Conservation	HvRzConservation
Bn32	CAGAGAGGTATCCTCT	CCTACGGGNGGCWGCAG	GACTACHVGGGTATCTAATCC	Harvesting	Bulk	Conservation	HvBkConservation
Bn35	AAGAGGCATATCCTCT	CCTACGGGNGGCWGCAG	GACTACHVGGGTATCTAATCC	Harvesting	Rhizosphere	Conservation	HvRzConservation
Bn36	GTAGAGGATATCCTCT	CCTACGGGNGGCWGCAG	GACTACHVGGGTATCTAATCC	Harvesting	Bulk	Conservation	HvBkConservation
Bn39	AGGCAGAAAGAGTAGA	CCTACGGGNGGCWGCAG	GACTACHVGGGTATCTAATCC	Vegetative	Rhizosphere	Conventional	VegRzConventional
Bn40	TCCTGAGCAGAGTAGA	CCTACGGGNGGCWGCAG	GACTACHVGGGTATCTAATCC	Vegetative	Bulk	Conventional	VegBkConventional
Bn43	CTCTCTACAGAGTAGA	CCTACGGGNGGCWGCAG	GACTACHVGGGTATCTAATCC	Vegetative	Rhizosphere	Conventional	VegRzConventional
Bn44	CAGAGAGGAGAGTAGA	CCTACGGGNGGCWGCAG	GACTACHVGGGTATCTAATCC	Vegetative	Bulk	Conventional	VegBkConventional
Bn47	AAGAGGCAAGAGTAGA	CCTACGGGNGGCWGCAG	GACTACHVGGGTATCTAATCC	Vegetative	Rhizosphere	Conventional	VegRzConventional
Bn48	GTAGAGGAAGAGTAGA	CCTACGGGNGGCWGCAG	GACTACHVGGGTATCTAATCC	Vegetative	Bulk	Conventional	VegBkConventional
Bn51	AGGCAGAAGTAAGGAG	CCTACGGGNGGCWGCAG	GACTACHVGGGTATCTAATCC	Flowering	Rhizosphere	Conventional	FlRzConventional
Bn52	TCCTGAGCGTAAGGAG	CCTACGGGNGGCWGCAG	GACTACHVGGGTATCTAATCC	Flowering	Bulk	Conventional	FlBkConventional
Bn55	CTCTCTACGTAAGGAG	CCTACGGGNGGCWGCAG	GACTACHVGGGTATCTAATCC	Flowering	Rhizosphere	Conventional	FlRzConventional
Bn56	CAGAGAGGGTAAGGAG	CCTACGGGNGGCWGCAG	GACTACHVGGGTATCTAATCC	Flowering	Bulk	Conventional	FlBkConventional
Bn59	AAGAGGCAGTAAGGAG	CCTACGGGNGGCWGCAG	GACTACHVGGGTATCTAATCC	Flowering	Rhizosphere	Conventional	FlRzConventional
Bn60	GTAGAGGAGTAAGGAG	CCTACGGGNGGCWGCAG	GACTACHVGGGTATCTAATCC	Flowering	Bulk	Conventional	FlBkConventional
Bn63	AGGCAGAAACTGCATA	CCTACGGGNGGCWGCAG	GACTACHVGGGTATCTAATCC	Harvesting	Rhizosphere	Conventional	HvRzConventional
Bn64	TCCTGAGCACTGCATA	CCTACGGGNGGCWGCAG	GACTACHVGGGTATCTAATCC	Harvesting	Bulk	Conventional	HvBkConventional
Bn67	CTCTCTACACTGCATA	CCTACGGGNGGCWGCAG	GACTACHVGGGTATCTAATCC	Harvesting	Rhizosphere	Conventional	HvRzConventional
Bn68	CAGAGAGGACTGCATA	CCTACGGGNGGCWGCAG	GACTACHVGGGTATCTAATCC	Harvesting	Bulk	Conventional	HvBkConventional
Bn71	AAGAGGCAACTGCATA	CCTACGGGNGGCWGCAG	GACTACHVGGGTATCTAATCC	Harvesting	Rhizosphere	Conventional	HvRzConventional
Bn72	GTAGAGGAACTGCATA	CCTACGGGNGGCWGCAG	GACTACHVGGGTATCTAATCC	Harvesting	Bulk	Conventional	HvBkConventional

## Sheet: WS-1
Alpha Diversity
Soil Samples rarefied at 5,025
Sample ID	Growth stages	Microhabitat zones	Tillage	Observed	Chao1	se.chao1	Shannon
Bn3	Vegetative	Rhizosphere	Conservation (ST)	1110	1693.34	70.0472	6.08184
Bn4	Vegetative	Bulk soil	Conservation (ST)	1149	1666.67	62.8263	6.23037
Bn7	Vegetative	Rhizosphere	Conservation (ST)	1067	1500.07	55.4494	6.13078
Bn8	Vegetative	Bulk soil	Conservation (ST)	1217	1738.43	61.4122	6.33984
Bn11	Vegetative	Rhizosphere	Conservation (ST)	1143	1700.18	66.6081	6.21296
Bn12	Vegetative	Bulk soil	Conservation (ST)	1199	1794.47	70.1436	6.32466
Bn15	Flowering	Rhizosphere	Conservation (ST)	1048	1485.07	55.7012	6.04677
Bn16	Flowering	Bulk soil	Conservation (ST)	1200	1758.65	65.6421	6.3297
Bn19	Flowering	Rhizosphere	Conservation (ST)	1153	1686.07	64.39	6.21441
Bn20	Flowering	Bulk soil	Conservation (ST)	1133	1580.03	56.1747	6.25335
Bn23	Flowering	Rhizosphere	Conservation (ST)	1115	1542.66	53.5134	6.19645
Bn24	Flowering	Bulk soil	Conservation (ST)	1185	1845.4	79.5382	6.31082
Bn27	Harvesting	Rhizosphere	Conservation (ST)	1082	1586.03	63.8927	6.12216
Bn28	Harvesting	Bulk soil	Conservation (ST)	1080	1589.44	65.3524	6.13278
Bn31	Harvesting	Rhizosphere	Conservation (ST)	878	1287.31	57.8052	5.41437
Bn32	Harvesting	Bulk soil	Conservation (ST)	1132	1633.6	61.8491	6.21725
Bn35	Harvesting	Rhizosphere	Conservation (ST)	830	1338.15	71.606	5.3809
Bn36	Harvesting	Bulk soil	Conservation (ST)	1021	1280.53	36.6606	6.13159
Bn39	Vegetative	Rhizosphere	Conventional (CT)	944	1164.88	33.7018	6.04386
Bn40	Vegetative	Bulk soil	Conventional (CT)	1203	1670.03	56.9186	6.37037
Bn43	Vegetative	Rhizosphere	Conventional (CT)	1061	1499.17	57.0822	6.13457
Bn44	Vegetative	Bulk soil	Conventional (CT)	1166	1609.39	54.7803	6.31102
Bn47	Vegetative	Rhizosphere	Conventional (CT)	996	1264.71	38.0387	6.10294
Bn48	Vegetative	Bulk soil	Conventional (CT)	1214	1686.44	55.7729	6.30575
Bn51	Flowering	Rhizosphere	Conventional (CT)	1136	1565.03	54.5324	6.27462
Bn52	Flowering	Bulk soil	Conventional (CT)	1045	1321.81	38.4531	6.18633
Bn55	Flowering	Rhizosphere	Conventional (CT)	1128	1631.91	60.874	6.16866
Bn56	Flowering	Bulk soil	Conventional (CT)	1095	1560	59.3107	6.29708
Bn59	Flowering	Rhizosphere	Conventional (CT)	1231	1777.32	63.6399	6.39095
Bn60	Flowering	Bulk soil	Conventional (CT)	1079	1616.51	67.5774	6.14569
Bn63	Harvesting	Rhizosphere	Conventional (CT)	1143	1596.01	56.1195	6.25823
Bn64	Harvesting	Bulk soil	Conventional (CT)	1089	1532.26	56.4738	6.13383
Bn67	Harvesting	Rhizosphere	Conventional (CT)	824	952.339	22.7735	5.86525
Bn68	Harvesting	Bulk soil	Conventional (CT)	992	1365.2	51.7863	6.07501
Bn71	Harvesting	Rhizosphere	Conventional (CT)	1092	1509.05	54.3517	6.26283
Bn72	Harvesting	Bulk soil	Conventional (CT)	1105	1486.95	49.3021	6.25165
Normality test: Shapiro-Wilk test
Observed OTUs
W = 0.90267, p-value = 0.004041
Chao1
W = 0.93052, p-value = 0.02596
Shannon
W = 0.71659, p-value = 5.209e-07

## Sheet: WS-2
Alpha Diversity: Observed OTUs
	Df	Sum Sq	Mean Sq	F value	Pr(>F)
Growth stages	2	85751	42876	7.473	0.003	**
Tillage	1	1100	1100	0.192	0.6654
Microhabitat zones	1	48620	48620	8.474	0.00766	**
Growth stages : Tillage	2	11757	5879	1.025	0.37413
Growth stages : Microhabitat zones	2	35905	17953	3.129	0.06201	.
Tillage : Microhabitat zones	1	5801	5801	1.011	0.32467
Growth stages : Tillage : Microhabitat zones	2	31024	15512	2.704	0.08732	.
Residuals	24	137703	5738
---
Signif. codes: 0 ‘***’ 0.001 ‘**’ 0.01 ‘*’ 0.05 ‘.’ 0.1 ‘ ’ 1
Tukey multiple comparisons of means
95% family-wise confidence level
Fit: aov(formula = Ridhdhi_alpha_rare_info$Observed ~ Growth stages * Tillage * Microhabitat zones, data = Ridhdhi_alpha_rare_info)
Growth stages
	diff	lwr	upr	p adj
Harvesting-Flowering	-106.667	-183.892	-29.4414	0.0057055
Vegetative-Flowering	-6.58333	-83.8086	70.6419	0.97535
Vegetative-Harvesting	100.083	22.8581	177.309	0.0094879
Tillage
	diff	lwr	upr	p adj
Conventional-Conservation	-11.0556	-63.1671	41.056	0.665403
Microhabitat zones
	diff	lwr	upr	p adj
Rhizosphere-Bulk soil	-73.5	-125.612	-21.3885	0.0076595
Growth stages : Tillage
	diff	lwr	upr	p adj
Harvesting:Conservation-Flowering:Conservation	-135.167	-270.385	0.0517294	0.0501275
Vegetative:Conservation-Flowering:Conservation	8.5	-126.718	143.718	0.999956
Flowering:Conventional-Flowering:Conservation	-20	-155.218	115.218	0.997171
Harvesting:Conventional-Flowering:Conservation	-98.1667	-233.385	37.0517	0.255032
Vegetative:Conventional-Flowering:Conservation	-41.6667	-176.885	93.5517	0.928192
Vegetative:Conservation-Harvesting:Conservation	143.667	8.44827	278.885	0.0327426
Flowering:Conventional-Harvesting:Conservation	115.167	-20.0517	250.385	0.127499
Harvesting:Conventional-Harvesting:Conservation	37	-98.2184	172.218	0.955484
Vegetative:Conventional-Harvesting:Conservation	93.5	-41.7184	228.718	0.302342
Flowering:Conventional-Vegetative:Conservation	-28.5	-163.718	106.718	0.985532
Harvesting:Conventional-Vegetative:Conservation	-106.667	-241.885	28.5517	0.182762
Vegetative:Conventional-Vegetative:Conservation	-50.1667	-185.385	85.0517	0.856658
Harvesting:Conventional-Flowering:Conventional	-78.1667	-213.385	57.0517	0.491839
Vegetative:Conventional-Flowering:Conventional	-21.6667	-156.885	113.552	0.995878
Vegetative:Conventional-Harvesting:Conventional	56.5	-78.7184	191.718	0.78641
Growth stages : Microhabitat zones
	diff	lwr	upr	p adj
Harvesting:Bulk soil-Flowering:Bulk soil	-53	-188.218	82.2184	0.826834
Vegetative:Bulk soil-Flowering:Bulk soil	68.5	-66.7184	203.718	0.627071
Flowering:Rhizosphere-Flowering:Bulk soil	12.3333	-122.885	147.552	0.999725
Harvesting:Rhizosphere-Flowering:Bulk soil	-148	-283.218	-12.7816	0.0262124
Vegetative:Rhizosphere-Flowering:Bulk soil	-69.3333	-204.552	65.8851	0.615359
Vegetative:Bulk soil-Harvesting:Bulk soil	121.5	-13.7184	256.718	0.0960094
Flowering:Rhizosphere-Harvesting:Bulk soil	65.3333	-69.8851	200.552	0.671173
Harvesting:Rhizosphere-Harvesting:Bulk soil	-95	-230.218	40.2184	0.286547
Vegetative:Rhizosphere-Harvesting:Bulk soil	-16.3333	-151.552	118.885	0.998924
Flowering:Rhizosphere-Vegetative:Bulk soil	-56.1667	-191.385	79.0517	0.790416
Harvesting:Rhizosphere-Vegetative:Bulk soil	-216.5	-351.718	-81.2816	0.0006023
Vegetative:Rhizosphere-Vegetative:Bulk soil	-137.833	-273.052	-2.61494	0.0439282
Harvesting:Rhizosphere-Flowering:Rhizosphere	-160.333	-295.552	-25.1149	0.0136919
Vegetative:Rhizosphere-Flowering:Rhizosphere	-81.6667	-216.885	53.5517	0.444767
Vegetative:Rhizosphere-Harvesting:Rhizosphere	78.6667	-56.5517	213.885	0.485015
Tillage : Microhabitat zones
	diff	lwr	upr	p adj
Conventional:Bulk soil-Conservation:Bulk soil	-36.4444	-134.948	62.0588	0.739145
Conservation:Rhizosphere-Conservation:Bulk soil	-98.8889	-197.392	-0.385661	0.0488602
Conventional:Rhizosphere-Conservation:Bulk soil	-84.5556	-183.059	13.9477	0.110785
Conservation:Rhizosphere-Conventional:Bulk soil	-62.4444	-160.948	36.0588	0.321762
Conventional:Rhizosphere-Conventional:Bulk soil	-48.1111	-146.614	50.3921	0.543076
Conventional:Rhizosphere-Conservation:Rhizosphere	14.3333	-84.1699	112.837	0.97761
Growth stages : Tillage : Microhabitat zones
	diff	lwr	upr	p adj
Harvesting:Conservation:Bulk soil-Flowering:Conservation:Bulk soil	-95	-317.999	127.999	0.915281
Vegetative:Conservation:Bulk soil-Flowering:Conservation:Bulk soil	15.6667	-207.332	238.665	1
Flowering:Conventional:Bulk soil-Flowering:Conservation:Bulk soil	-99.6667	-322.665	123.332	0.888501
Harvesting:Conventional:Bulk soil-Flowering:Conservation:Bulk soil	-110.667	-333.665	112.332	0.808463
Vegetative:Conventional:Bulk soil-Flowering:Conservation:Bulk soil	21.6667	-201.332	244.665	1
Flowering:Conservation:Rhizosphere-Flowering:Conservation:Bulk soil	-67.3333	-290.332	155.665	0.992377
Harvesting:Conservation:Rhizosphere-Flowering:Conservation:Bulk soil	-242.667	-465.665	-19.6681	0.0247677
Vegetative:Conservation:Rhizosphere-Flowering:Conservation:Bulk soil	-66	-288.999	156.999	0.993507
Flowering:Conventional:Rhizosphere-Flowering:Conservation:Bulk soil	-7.66667	-230.665	215.332	1
Harvesting:Conventional:Rhizosphere-Flowering:Conservation:Bulk soil	-153	-375.999	69.9985	0.399471
Vegetative:Conventional:Rhizosphere-Flowering:Conservation:Bulk soil	-172.333	-395.332	50.6652	0.246214
Vegetative:Conservation:Bulk soil-Harvesting:Conservation:Bulk soil	110.667	-112.332	333.665	0.808463
Flowering:Conventional:Bulk soil-Harvesting:Conservation:Bulk soil	-4.66667	-227.665	218.332	1
Harvesting:Conventional:Bulk soil-Harvesting:Conservation:Bulk soil	-15.6667	-238.665	207.332	1
Vegetative:Conventional:Bulk soil-Harvesting:Conservation:Bulk soil	116.667	-106.332	339.665	0.756169
Flowering:Conservation:Rhizosphere-Harvesting:Conservation:Bulk soil	27.6667	-195.332	250.665	0.999998
Harvesting:Conservation:Rhizosphere-Harvesting:Conservation:Bulk soil	-147.667	-370.665	75.3319	0.449221
Vegetative:Conservation:Rhizosphere-Harvesting:Conservation:Bulk soil	29	-193.999	251.999	0.999997
Flowering:Conventional:Rhizosphere-Harvesting:Conservation:Bulk soil	87.3333	-135.665	310.332	0.949667
Harvesting:Conventional:Rhizosphere-Harvesting:Conservation:Bulk soil	-58	-280.999	164.999	0.997797
Vegetative:Conventional:Rhizosphere-Harvesting:Conservation:Bulk soil	-77.3333	-300.332	145.665	0.978135
Flowering:Conventional:Bulk soil-Vegetative:Conservation:Bulk soil	-115.333	-338.332	107.665	0.768229
Harvesting:Conventional:Bulk soil-Vegetative:Conservation:Bulk soil	-126.333	-349.332	96.6652	0.663155
Vegetative:Conventional:Bulk soil-Vegetative:Conservation:Bulk soil	6	-216.999	228.999	1
Flowering:Conservation:Rhizosphere-Vegetative:Conservation:Bulk soil	-83	-305.999	139.999	0.964092
Harvesting:Conservation:Rhizosphere-Vegetative:Conservation:Bulk soil	-258.333	-481.332	-35.3348	0.0138675
Vegetative:Conservation:Rhizosphere-Vegetative:Conservation:Bulk soil	-81.6667	-304.665	141.332	0.967862
Flowering:Conventional:Rhizosphere-Vegetative:Conservation:Bulk soil	-23.3333	-246.332	199.665	1
Harvesting:Conventional:Rhizosphere-Vegetative:Conservation:Bulk soil	-168.667	-391.665	54.3319	0.27165
Vegetative:Conventional:Rhizosphere-Vegetative:Conservation:Bulk soil	-188	-410.999	34.9986	0.156988
Harvesting:Conventional:Bulk soil-Flowering:Conventional:Bulk soil	-11	-233.999	211.999	1
Vegetative:Conventional:Bulk soil-Flowering:Conventional:Bulk soil	121.333	-101.665	344.332	0.712321
Flowering:Conservation:Rhizosphere-Flowering:Conventional:Bulk soil	32.3333	-190.665	255.332	0.999992
Harvesting:Conservation:Rhizosphere-Flowering:Conventional:Bulk soil	-143	-365.999	79.9985	0.49469
Vegetative:Conservation:Rhizosphere-Flowering:Conventional:Bulk soil	33.6667	-189.332	256.665	0.999987
Flowering:Conventional:Rhizosphere-Flowering:Conventional:Bulk soil	92	-130.999	314.999	0.93014
Harvesting:Conventional:Rhizosphere-Flowering:Conventional:Bulk soil	-53.3333	-276.332	169.665	0.998948
Vegetative:Conventional:Rhizosphere-Flowering:Conventional:Bulk soil	-72.6667	-295.665	150.332	0.986208
Vegetative:Conventional:Bulk soil-Harvesting:Conventional:Bulk soil	132.333	-90.6652	355.332	0.602467
Flowering:Conservation:Rhizosphere-Harvesting:Conventional:Bulk soil	43.3333	-179.665	266.332	0.999847
Harvesting:Conservation:Rhizosphere-Harvesting:Conventional:Bulk soil	-132	-354.999	90.9985	0.605862
Vegetative:Conservation:Rhizosphere-Harvesting:Conventional:Bulk soil	44.6667	-178.332	267.665	0.999796
Flowering:Conventional:Rhizosphere-Harvesting:Conventional:Bulk soil	103	-119.999	325.999	0.866671
Harvesting:Conventional:Rhizosphere-Harvesting:Conventional:Bulk soil	-42.3333	-265.332	180.665	0.999878
Vegetative:Conventional:Rhizosphere-Harvesting:Conventional:Bulk soil	-61.6667	-284.665	161.332	0.996287
Flowering:Conservation:Rhizosphere-Vegetative:Conventional:Bulk soil	-89	-311.999	133.999	0.943184
Harvesting:Conservation:Rhizosphere-Vegetative:Conventional:Bulk soil	-264.333	-487.332	-41.3348	0.0110647
Vegetative:Conservation:Rhizosphere-Vegetative:Conventional:Bulk soil	-87.6667	-310.665	135.332	0.948413
Flowering:Conventional:Rhizosphere-Vegetative:Conventional:Bulk soil	-29.3333	-252.332	193.665	0.999997
Harvesting:Conventional:Rhizosphere-Vegetative:Conventional:Bulk soil	-174.667	-397.665	48.3319	0.230945
Vegetative:Conventional:Rhizosphere-Vegetative:Conventional:Bulk soil	-194	-416.999	28.9986	0.130617
Harvesting:Conservation:Rhizosphere-Flowering:Conservation:Rhizosphere	-175.333	-398.332	47.6652	0.226712
Vegetative:Conservation:Rhizosphere-Flowering:Conservation:Rhizosphere	1.33333	-221.665	224.332	1
Flowering:Conventional:Rhizosphere-Flowering:Conservation:Rhizosphere	59.6667	-163.332	282.665	0.997191
Harvesting:Conventional:Rhizosphere-Flowering:Conservation:Rhizosphere	-85.6667	-308.665	137.332	0.955621
Vegetative:Conventional:Rhizosphere-Flowering:Conservation:Rhizosphere	-105	-327.999	117.999	0.852526
Vegetative:Conservation:Rhizosphere-Harvesting:Conservation:Rhizosphere	176.667	-46.3319	399.665	0.218421
Flowering:Conventional:Rhizosphere-Harvesting:Conservation:Rhizosphere	235	12.0015	457.999	0.0326961
Harvesting:Conventional:Rhizosphere-Harvesting:Conservation:Rhizosphere	89.6667	-133.332	312.665	0.94044
Vegetative:Conventional:Rhizosphere-Harvesting:Conservation:Rhizosphere	70.3333	-152.665	293.332	0.98926
Flowering:Conventional:Rhizosphere-Vegetative:Conservation:Rhizosphere	58.3333	-164.665	281.332	0.997686
Harvesting:Conventional:Rhizosphere-Vegetative:Conservation:Rhizosphere	-87	-309.999	135.999	0.950899
Vegetative:Conventional:Rhizosphere-Vegetative:Conservation:Rhizosphere	-106.333	-329.332	116.665	0.842675
Harvesting:Conventional:Rhizosphere-Flowering:Conventional:Rhizosphere	-145.333	-368.332	77.6652	0.471761
Vegetative:Conventional:Rhizosphere-Flowering:Conventional:Rhizosphere	-164.667	-387.665	58.3319	0.301397
Vegetative:Conventional:Rhizosphere-Harvesting:Conventional:Rhizosphere	-19.3333	-242.332	203.665	1

## Sheet: WS-3
Alpha Diversity: Chao1
	Df	Sum Sq	Mean Sq	F value	Pr(>F)
Growth stages	2	233294	116647	4.584	0.0206	*
Tillage	1	99971	99971	3.929	0.059	.
Microhabitat zones	1	106330	106330	4.179	0.0521	.
Growth stages : Tillage	2	41033	20517	0.806	0.4583
Growth stages : Microhabitat zones	2	75931	37965	1.492	0.2451
Tillage : Microhabitat zones	1	902	902	0.035	0.8523
Growth stages : Tillage : Microhabitat zones	2	118352	59176	2.326	0.1194
Residuals	24	610712	25446
---
Signif. codes: 0 ‘***’ 0.001 ‘**’ 0.01 ‘*’ 0.05 ‘.’ 0.1 ‘ ’ 1
Tukey multiple comparisons of means
95% family-wise confidence level
Fit: aov(formula = Ridhdhi_alpha_rare_info$Chao1 ~ Growth stages * Tillage * Microhabitat zones, data = Ridhdhi_alpha_rare_info)
Growth stages
	diff	lwr	upr	p adj
Harvesting-Flowering	-184.465	-347.097	-21.8333	0.0240923
Vegetative-Flowering	-31.8898	-194.522	130.742	0.876859
Vegetative-Harvesting	152.575	-10.0565	315.207	0.0688408
Tillage
	diff	lwr	upr	p adj
Conventional-Conservation	-105.394	-215.138	4.34965	0.0590314
Microhabitat zones
	diff	lwr	upr	p adj
Rhizosphere-Bulk soil	-108.694	-218.438	1.04949	0.0520587
Growth stages : Tillage
	diff	lwr	upr	p adj
Harvesting:Conservation-Flowering:Conservation	-197.137	-481.898	87.6252	0.301167
Vegetative:Conservation-Flowering:Conservation	32.5468	-252.215	317.309	0.999176
Flowering:Conventional-Flowering:Conservation	-70.8841	-355.646	213.878	0.970076
Harvesting:Conventional-Flowering:Conservation	-242.678	-527.439	42.0843	0.127119
Vegetative:Conventional-Flowering:Conservation	-167.21	-451.972	117.551	0.475069
Vegetative:Conservation-Harvesting:Conservation	229.683	-55.0784	514.445	0.165533
Flowering:Conventional-Harvesting:Conservation	126.253	-158.509	411.014	0.743266
Harvesting:Conventional-Harvesting:Conservation	-45.5409	-330.303	239.221	0.995915
Vegetative:Conventional-Harvesting:Conservation	29.9262	-254.836	314.688	0.999452
Flowering:Conventional-Vegetative:Conservation	-103.431	-388.193	181.331	0.867017
Harvesting:Conventional-Vegetative:Conservation	-275.224	-559.986	9.53745	0.0623408
Vegetative:Conventional-Vegetative:Conservation	-199.757	-484.519	85.0046	0.288059
Harvesting:Conventional-Flowering:Conventional	-171.793	-456.555	112.968	0.445968
Vegetative:Conventional-Flowering:Conventional	-96.3263	-381.088	188.435	0.897408
Vegetative:Conventional-Harvesting:Conventional	75.4672	-209.295	360.229	0.961018
Growth stages : Microhabitat zones
	diff	lwr	upr	p adj
Harvesting:Bulk soil-Flowering:Bulk soil	-132.403	-417.165	152.359	0.704731
Vegetative:Bulk soil-Flowering:Bulk soil	80.5039	-204.258	365.266	0.949114
Flowering:Rhizosphere-Flowering:Bulk soil	0.943005	-283.819	285.705	1
Harvesting:Rhizosphere-Flowering:Bulk soil	-235.584	-520.346	49.1776	0.147064
Vegetative:Rhizosphere-Flowering:Bulk soil	-143.34	-428.102	141.421	0.633175
Vegetative:Bulk soil-Harvesting:Bulk soil	212.907	-71.855	497.669	0.228089
Flowering:Rhizosphere-Harvesting:Bulk soil	133.346	-151.416	418.108	0.698691
Harvesting:Rhizosphere-Harvesting:Bulk soil	-103.181	-387.943	181.58	0.868157
Vegetative:Rhizosphere-Harvesting:Bulk soil	-10.9375	-295.699	273.824	0.999996
Flowering:Rhizosphere-Vegetative:Bulk soil	-79.5609	-364.323	205.201	0.951503
Harvesting:Rhizosphere-Vegetative:Bulk soil	-316.088	-600.85	-31.3263	0.0235143
Vegetative:Rhizosphere-Vegetative:Bulk soil	-223.844	-508.606	60.9175	0.185577
Harvesting:Rhizosphere-Flowering:Rhizosphere	-236.527	-521.289	48.2346	0.144273
Vegetative:Rhizosphere-Flowering:Rhizosphere	-144.283	-429.045	140.478	0.626894
Vegetative:Rhizosphere-Harvesting:Rhizosphere	92.2438	-192.518	377.006	0.912875
Tillage : Microhabitat zones
	diff	lwr	upr	p adj
Conventional:Bulk soil-Conservation:Bulk soil	-115.404	-322.846	92.0382	0.433426
Conservation:Rhizosphere-Conservation:Bulk soil	-118.704	-326.146	88.7381	0.40913
Conventional:Rhizosphere-Conservation:Bulk soil	-214.088	-421.53	-6.6464	0.0413397
Conservation:Rhizosphere-Conventional:Bulk soil	-3.30016	-210.742	204.142	0.999969
Conventional:Rhizosphere-Conventional:Bulk soil	-98.6846	-306.127	108.757	0.564304
Conventional:Rhizosphere-Conservation:Rhizosphere	-95.3845	-302.826	112.057	0.59103
Growth stages : Tillage : Microhabitat zones
	diff	lwr	upr	p adj
Harvesting:Conservation:Bulk soil-Flowering:Conservation:Bulk soil	-226.836	-696.457	242.786	0.832143
Vegetative:Conservation:Bulk soil-Flowering:Conservation:Bulk soil	5.16421	-464.457	474.786	1
Flowering:Conventional:Bulk soil-Flowering:Conservation:Bulk soil	-228.585	-698.207	241.036	0.825635
Harvesting:Conventional:Bulk soil-Flowering:Conservation:Bulk soil	-266.555	-736.177	203.066	0.660756
Vegetative:Conventional:Bulk soil-Flowering:Conservation:Bulk soil	-72.7419	-542.363	396.88	0.999984
Flowering:Conservation:Rhizosphere-Flowering:Conservation:Bulk soil	-156.758	-626.38	312.863	0.983476
Harvesting:Conservation:Rhizosphere-Flowering:Conservation:Bulk soil	-324.196	-793.817	145.426	0.39096
Vegetative:Conservation:Rhizosphere-Flowering:Conservation:Bulk soil	-96.829	-566.451	372.792	0.999732
Flowering:Conventional:Rhizosphere-Flowering:Conservation:Bulk soil	-69.9411	-539.563	399.68	0.999989
Harvesting:Conventional:Rhizosphere-Flowering:Conservation:Bulk soil	-375.558	-845.18	94.0633	0.208382
Vegetative:Conventional:Rhizosphere-Flowering:Conservation:Bulk soil	-418.437	-888.059	51.1843	0.112669
Vegetative:Conservation:Bulk soil-Harvesting:Conservation:Bulk soil	232	-237.621	701.622	0.81259
Flowering:Conventional:Bulk soil-Harvesting:Conservation:Bulk soil	-1.7495	-471.371	467.872	1
Harvesting:Conventional:Bulk soil-Harvesting:Conservation:Bulk soil	-39.7193	-509.341	429.902	1
Vegetative:Conventional:Bulk soil-Harvesting:Conservation:Bulk soil	154.094	-315.527	623.716	0.985468
Flowering:Conservation:Rhizosphere-Harvesting:Conservation:Bulk soil	70.0776	-399.544	539.699	0.999989
Harvesting:Conservation:Rhizosphere-Harvesting:Conservation:Bulk soil	-97.3597	-566.981	372.262	0.999718
Vegetative:Conservation:Rhizosphere-Harvesting:Conservation:Bulk soil	130.007	-339.615	599.628	0.996253
Flowering:Conventional:Rhizosphere-Harvesting:Conservation:Bulk soil	156.895	-312.727	626.516	0.983369
Harvesting:Conventional:Rhizosphere-Harvesting:Conservation:Bulk soil	-148.722	-618.344	320.899	0.988916
Vegetative:Conventional:Rhizosphere-Harvesting:Conservation:Bulk soil	-191.601	-661.223	278.02	0.93477
Flowering:Conventional:Bulk soil-Vegetative:Conservation:Bulk soil	-233.75	-703.371	235.872	0.805737
Harvesting:Conventional:Bulk soil-Vegetative:Conservation:Bulk soil	-271.719	-741.341	197.902	0.636069
Vegetative:Conventional:Bulk soil-Vegetative:Conservation:Bulk soil	-77.9061	-547.528	391.715	0.999968
Flowering:Conservation:Rhizosphere-Vegetative:Conservation:Bulk soil	-161.923	-631.544	307.699	0.979029
Harvesting:Conservation:Rhizosphere-Vegetative:Conservation:Bulk soil	-329.36	-798.981	140.262	0.369288
Vegetative:Conservation:Rhizosphere-Vegetative:Conservation:Bulk soil	-101.993	-571.615	367.628	0.999564
Flowering:Conventional:Rhizosphere-Vegetative:Conservation:Bulk soil	-75.1053	-544.727	394.516	0.999977
Harvesting:Conventional:Rhizosphere-Vegetative:Conservation:Bulk soil	-380.722	-850.344	88.8991	0.194251
Vegetative:Conventional:Rhizosphere-Vegetative:Conservation:Bulk soil	-423.601	-893.223	46.02	0.10416
Harvesting:Conventional:Bulk soil-Flowering:Conventional:Bulk soil	-37.9698	-507.591	431.652	1
Vegetative:Conventional:Bulk soil-Flowering:Conventional:Bulk soil	155.844	-313.778	625.465	0.984182
Flowering:Conservation:Rhizosphere-Flowering:Conventional:Bulk soil	71.8271	-397.794	541.449	0.999986
Harvesting:Conservation:Rhizosphere-Flowering:Conventional:Bulk soil	-95.6102	-565.232	374.011	0.999762
Vegetative:Conservation:Rhizosphere-Flowering:Conventional:Bulk soil	131.756	-337.865	601.378	0.995811
Flowering:Conventional:Rhizosphere-Flowering:Conventional:Bulk soil	158.644	-310.977	628.266	0.981945
Harvesting:Conventional:Rhizosphere-Flowering:Conventional:Bulk soil	-146.973	-616.594	322.649	0.989889
Vegetative:Conventional:Rhizosphere-Flowering:Conventional:Bulk soil	-189.852	-659.473	279.77	0.938393
Vegetative:Conventional:Bulk soil-Harvesting:Conventional:Bulk soil	193.813	-275.808	663.435	0.929993
Flowering:Conservation:Rhizosphere-Harvesting:Conventional:Bulk soil	109.797	-359.825	579.418	0.999142
Harvesting:Conservation:Rhizosphere-Harvesting:Conventional:Bulk soil	-57.6404	-527.262	411.981	0.999999
Vegetative:Conservation:Rhizosphere-Harvesting:Conventional:Bulk soil	169.726	-299.895	639.348	0.970679
Flowering:Conventional:Rhizosphere-Harvesting:Conventional:Bulk soil	196.614	-273.007	666.236	0.923623
Harvesting:Conventional:Rhizosphere-Harvesting:Conventional:Bulk soil	-109.003	-578.625	360.619	0.999197
Vegetative:Conventional:Rhizosphere-Harvesting:Conventional:Bulk soil	-151.882	-621.504	317.74	0.986976
Flowering:Conservation:Rhizosphere-Vegetative:Conventional:Bulk soil	-84.0165	-553.638	385.605	0.999931
Harvesting:Conservation:Rhizosphere-Vegetative:Conventional:Bulk soil	-251.454	-721.075	218.168	0.73075
Vegetative:Conservation:Rhizosphere-Vegetative:Conventional:Bulk soil	-24.0871	-493.709	445.534	1
Flowering:Conventional:Rhizosphere-Vegetative:Conventional:Bulk soil	2.80086	-466.821	472.422	1
Harvesting:Conventional:Rhizosphere-Vegetative:Conventional:Bulk soil	-302.816	-772.438	166.805	0.486872
Vegetative:Conventional:Rhizosphere-Vegetative:Conventional:Bulk soil	-345.695	-815.317	123.926	0.30537
Harvesting:Conservation:Rhizosphere-Flowering:Conservation:Rhizosphere	-167.437	-637.059	302.184	0.973345
Vegetative:Conservation:Rhizosphere-Flowering:Conservation:Rhizosphere	59.9294	-409.692	529.551	0.999998
Flowering:Conventional:Rhizosphere-Flowering:Conservation:Rhizosphere	86.8174	-382.804	556.439	0.999906
Harvesting:Conventional:Rhizosphere-Flowering:Conservation:Rhizosphere	-218.8	-688.421	250.822	0.860425
Vegetative:Conventional:Rhizosphere-Flowering:Conservation:Rhizosphere	-261.679	-731.3	207.943	0.683784
Vegetative:Conservation:Rhizosphere-Harvesting:Conservation:Rhizosphere	227.367	-242.255	696.988	0.830182
Flowering:Conventional:Rhizosphere-Harvesting:Conservation:Rhizosphere	254.255	-215.367	723.876	0.718097
Harvesting:Conventional:Rhizosphere-Harvesting:Conservation:Rhizosphere	-51.3626	-520.984	418.259	1
Vegetative:Conventional:Rhizosphere-Harvesting:Conservation:Rhizosphere	-94.2416	-563.863	375.38	0.999792
Flowering:Conventional:Rhizosphere-Vegetative:Conservation:Rhizosphere	26.888	-442.733	496.509	1
Harvesting:Conventional:Rhizosphere-Vegetative:Conservation:Rhizosphere	-278.729	-748.351	190.892	0.602258
Vegetative:Conventional:Rhizosphere-Vegetative:Conservation:Rhizosphere	-321.608	-791.23	148.013	0.402062
Harvesting:Conventional:Rhizosphere-Flowering:Conventional:Rhizosphere	-305.617	-775.239	164.004	0.473828
Vegetative:Conventional:Rhizosphere-Flowering:Conventional:Rhizosphere	-348.496	-818.118	121.125	0.295162
Vegetative:Conventional:Rhizosphere-Harvesting:Conventional:Rhizosphere	-42.879	-512.5	426.743	1

## Sheet: WS-4
Alpha Diversity: Shannon
	Df	Sum Sq	Mean Sq	F value	Pr(>F)
Growth stages	2	0.3372	0.16862	7.286	0.00337	**
Tillage	1	0.0631	0.06314	2.728	0.11162
Microhabitat zones	1	0.2575	0.25748	11.125	0.00276	**
Growth stages : Tillage	2	0.1128	0.0564	2.437	0.10877
Growth stages : Microhabitat zones	2	0.0857	0.04286	1.852	0.17866
Tillage : Microhabitat zones	1	0.0997	0.09974	4.31	0.04877	*
Growth stages : Tillage : Microhabitat zones	2	0.1242	0.06211	2.684	0.08876	.
Residuals	24	0.5554	0.02314
---
Signif. codes: 0 ‘***’ 0.001 ‘**’ 0.01 ‘*’ 0.05 ‘.’ 0.1 ‘ ’ 1
Tukey multiple comparisons of means
95% family-wise confidence level
Fit: aov(formula = Ridhdhi_alpha_rare_info$Shannon ~ Growth stages * Tillage * Microhabitat zones, data = Ridhdhi_alpha_rare_info)
Growth stages
	diff	lwr	upr	p adj
Harvesting-Flowering	-0.214079	-0.369177	-0.0589806	0.0057386
Vegetative-Flowering	-0.0188225	-0.173921	0.136276	0.950733
Vegetative-Harvesting	0.195256	0.0401581	0.350354	0.0117964
Tillage
	diff	lwr	upr	p adj
Conventional-Conservation	0.0837579	-0.0209021	0.188418	0.11162
Microhabitat zones
	diff	lwr	upr	p adj
Rhizosphere-Bulk soil	soil	-0.169142	-0.273802	-0.0644821	0.0027617
Growth stages : Tillage
	diff	lwr	upr	p adj
Harvesting:Conservation-Flowering:Conservation	-0.325405	-0.596976	-0.0538341	0.0125059
Vegetative:Conservation-Flowering:Conservation	-0.00517624	-0.276747	0.266395	1
Flowering:Conventional-Flowering:Conservation	0.0186381	-0.252933	0.290209	0.999932
Harvesting:Conventional-Flowering:Conservation	-0.0841146	-0.355685	0.187456	0.926731
Vegetative:Conventional-Flowering:Conservation	-0.0138307	-0.285402	0.25774	0.999985
Vegetative:Conservation-Harvesting:Conservation	0.320229	0.0486578	0.591799	0.0143572
Flowering:Conventional-Harvesting:Conservation	0.344043	0.0724721	0.615614	0.0075605
Harvesting:Conventional-Harvesting:Conservation	0.24129	-0.0302806	0.512861	0.102138
Vegetative:Conventional-Harvesting:Conservation	0.311574	0.0400033	0.583145	0.0180498
Flowering:Conventional-Vegetative:Conservation	0.0238143	-0.247756	0.295385	0.999773
Harvesting:Conventional-Vegetative:Conservation	-0.0789384	-0.350509	0.192632	0.943052
Vegetative:Conventional-Vegetative:Conservation	-0.00865449	-0.280225	0.262916	0.999999
Harvesting:Conventional-Flowering:Conventional	-0.102753	-0.374323	0.168818	0.8465
Vegetative:Conventional-Flowering:Conventional	-0.0324688	-0.30404	0.239102	0.998976
Vegetative:Conventional-Harvesting:Conventional	0.0702839	-0.201287	0.341855	0.964709
Growth stages : Microhabitat zones
	diff	lwr	upr	p adj
Harvesting:Bulk soil-Flowering:Bulk soil	-0.0968078	-0.368379	0.174763	0.87566
Vegetative:Bulk soil-Flowering:Bulk soil	0.0598398	-0.211731	0.331411	0.982378
Flowering:Rhizosphere-Flowering:Bulk soil	-0.0385199	-0.310091	0.233051	0.997681
Harvesting:Rhizosphere-Flowering:Bulk soil	-0.36987	-0.641441	-0.0982989	0.0037167
Vegetative:Rhizosphere-Flowering:Bulk soil	-0.136005	-0.407576	0.135566	0.638025
Vegetative:Bulk soil-Harvesting:Bulk soil	0.156648	-0.114923	0.428218	0.494165
Flowering:Rhizosphere-Harvesting:Bulk soil	0.0582878	-0.213283	0.329859	0.984314
Harvesting:Rhizosphere-Harvesting:Bulk soil	-0.273062	-0.544633	-0.00149117	0.0482026
Vegetative:Rhizosphere-Harvesting:Bulk soil	-0.039197	-0.310768	0.232374	0.997481
Flowering:Rhizosphere-Vegetative:Bulk soil	-0.0983598	-0.369931	0.173211	0.868357
Harvesting:Rhizosphere-Vegetative:Bulk soil	-0.42971	-0.70128	-0.158139	0.0006954
Vegetative:Rhizosphere-Vegetative:Bulk soil	-0.195845	-0.467415	0.0757262	0.261328
Harvesting:Rhizosphere-Flowering:Rhizosphere	-0.33135	-0.602921	-0.059779	0.0106619
Vegetative:Rhizosphere-Flowering:Rhizosphere	-0.0974849	-0.369056	0.174086	0.872502
Vegetative:Rhizosphere-Harvesting:Rhizosphere	0.233865	-0.0377059	0.505436	0.120528
Tillage : Microhabitat zones
	diff	lwr	upr	p adj
Conventional:Bulk soil-Conservation:Bulk soil	-0.0215162	-0.219349	0.176316	0.990371
Conservation:Rhizosphere-Conservation:Bulk soil	-0.274416	-0.472249	-0.0765838	0.0042381
Conventional:Rhizosphere-Conservation:Bulk soil	-0.0853842	-0.283217	0.112448	0.638459
Conservation:Rhizosphere-Conventional:Bulk soil	-0.2529	-0.450733	-0.0550676	0.0087368
Conventional:Rhizosphere-Conventional:Bulk soil	-0.0638681	-0.261701	0.133964	0.809743
Conventional:Rhizosphere-Conservation:Rhizosphere	0.189032	-0.0088005	0.386865	0.0647342
Growth stages : Tillage : Microhabitat zones
	diff	lwr	upr	p adj
Harvesting:Conservation:Bulk soil-Flowering:Conservation:Bulk soil	-0.137415	-0.585282	0.310453	0.991344
Vegetative:Conservation:Bulk soil-Flowering:Conservation:Bulk soil	0.000330016	-0.447537	0.448197	1
Flowering:Conventional:Bulk soil-Flowering:Conservation:Bulk soil	-0.0882606	-0.536128	0.359607	0.999825
Harvesting:Conventional:Bulk soil-Flowering:Conservation:Bulk soil	-0.144462	-0.592329	0.303406	0.987238
Vegetative:Conventional:Bulk soil-Flowering:Conservation:Bulk soil	0.031089	-0.416778	0.478956	1
Flowering:Conservation:Rhizosphere-Flowering:Conservation:Bulk soil	-0.145419	-0.593286	0.302449	0.986579
Harvesting:Conservation:Rhizosphere-Flowering:Conservation:Bulk soil	-0.658814	-1.10668	-0.210946	0.0009432
Vegetative:Conservation:Rhizosphere-Flowering:Conservation:Bulk soil	-0.156101	-0.603968	0.291766	0.977324
Flowering:Conventional:Rhizosphere-Flowering:Conservation:Bulk soil	-0.0198819	-0.467749	0.427985	1
Harvesting:Conventional:Rhizosphere-Flowering:Conservation:Bulk soil	-0.169186	-0.617054	0.278681	0.960311
Vegetative:Conventional:Rhizosphere-Flowering:Conservation:Bulk soil	-0.204169	-0.652036	0.243698	0.875724
Vegetative:Conservation:Bulk soil-Harvesting:Conservation:Bulk soil	0.137745	-0.310123	0.585612	0.991179
Flowering:Conventional:Bulk soil-Harvesting:Conservation:Bulk soil	0.049154	-0.398713	0.497021	1
Harvesting:Conventional:Bulk soil-Harvesting:Conservation:Bulk soil	-0.00704688	-0.454914	0.44082	1
Vegetative:Conventional:Bulk soil-Harvesting:Conservation:Bulk soil	0.168504	-0.279364	0.616371	0.961375
Flowering:Conservation:Rhizosphere-Harvesting:Conservation:Bulk soil	-0.00800402	-0.455871	0.439863	1
Harvesting:Conservation:Rhizosphere-Harvesting:Conservation:Bulk soil	-0.521399	-0.969266	-0.0735318	0.0132185
Vegetative:Conservation:Rhizosphere-Harvesting:Conservation:Bulk soil	-0.0186865	-0.466554	0.429181	1
Flowering:Conventional:Rhizosphere-Harvesting:Conservation:Bulk soil	0.117533	-0.330335	0.5654	0.997621
Harvesting:Conventional:Rhizosphere-Harvesting:Conservation:Bulk soil	-0.0317718	-0.479639	0.416096	1
Vegetative:Conventional:Rhizosphere-Harvesting:Conservation:Bulk soil	-0.0667545	-0.514622	0.381113	0.999989
Flowering:Conventional:Bulk soil-Vegetative:Conservation:Bulk soil	-0.0885907	-0.536458	0.359277	0.999819
Harvesting:Conventional:Bulk soil-Vegetative:Conservation:Bulk soil	-0.144792	-0.592659	0.303076	0.987013
Vegetative:Conventional:Bulk soil-Vegetative:Conservation:Bulk soil	0.030759	-0.417108	0.478626	1
Flowering:Conservation:Rhizosphere-Vegetative:Conservation:Bulk soil	-0.145749	-0.593616	0.302119	0.986347
Harvesting:Conservation:Rhizosphere-Vegetative:Conservation:Bulk soil	-0.659144	-1.10701	-0.211276	0.0009372
Vegetative:Conservation:Rhizosphere-Vegetative:Conservation:Bulk soil	-0.156431	-0.604298	0.291436	0.976977
Flowering:Conventional:Rhizosphere-Vegetative:Conservation:Bulk soil	-0.0202119	-0.468079	0.427655	1
Harvesting:Conventional:Rhizosphere-Vegetative:Conservation:Bulk soil	-0.169516	-0.617384	0.278351	0.959789
Vegetative:Conventional:Rhizosphere-Vegetative:Conservation:Bulk soil	-0.204499	-0.652366	0.243368	0.874634
Harvesting:Conventional:Bulk soil-Flowering:Conventional:Bulk soil	-0.0562009	-0.504068	0.391666	0.999998
Vegetative:Conventional:Bulk soil-Flowering:Conventional:Bulk soil	0.11935	-0.328518	0.567217	0.997286
Flowering:Conservation:Rhizosphere-Flowering:Conventional:Bulk soil	-0.057158	-0.505025	0.390709	0.999998
Harvesting:Conservation:Rhizosphere-Flowering:Conventional:Bulk soil	-0.570553	-1.01842	-0.122686	0.0052064
Vegetative:Conservation:Rhizosphere-Flowering:Conventional:Bulk soil	-0.0678405	-0.515708	0.380027	0.999987
Flowering:Conventional:Rhizosphere-Flowering:Conventional:Bulk soil	0.0683788	-0.379489	0.516246	0.999986
Harvesting:Conventional:Rhizosphere-Flowering:Conventional:Bulk soil	-0.0809257	-0.528793	0.366942	0.999924
Vegetative:Conventional:Rhizosphere-Flowering:Conventional:Bulk soil	-0.115908	-0.563776	0.331959	0.99789
Vegetative:Conventional:Bulk soil-Harvesting:Conventional:Bulk soil	0.175551	-0.272317	0.623418	0.949385
Flowering:Conservation:Rhizosphere-Harvesting:Conventional:Bulk soil	-0.000957146	-0.448824	0.44691	1
Harvesting:Conservation:Rhizosphere-Harvesting:Conventional:Bulk soil	-0.514352	-0.962219	-0.0664849	0.015075
Vegetative:Conservation:Rhizosphere-Harvesting:Conventional:Bulk soil	-0.0116396	-0.459507	0.436228	1
Flowering:Conventional:Rhizosphere-Harvesting:Conventional:Bulk soil	0.12458	-0.323288	0.572447	0.9961
Harvesting:Conventional:Rhizosphere-Harvesting:Conventional:Bulk soil	-0.0247249	-0.472592	0.423142	1
Vegetative:Conventional:Rhizosphere-Harvesting:Conventional:Bulk soil	-0.0597076	-0.507575	0.38816	0.999996
Flowering:Conservation:Rhizosphere-Vegetative:Conventional:Bulk soil	-0.176508	-0.624375	0.27136	0.947579
Harvesting:Conservation:Rhizosphere-Vegetative:Conventional:Bulk soil	-0.689903	-1.13777	-0.242035	0.0005155
Vegetative:Conservation:Rhizosphere-Vegetative:Conventional:Bulk soil	-0.18719	-0.635057	0.260677	0.924396
Flowering:Conventional:Rhizosphere-Vegetative:Conventional:Bulk soil	-0.0509709	-0.498838	0.396896	0.999999
Harvesting:Conventional:Rhizosphere-Vegetative:Conventional:Bulk soil	-0.200275	-0.648143	0.247592	0.888173
Vegetative:Conventional:Rhizosphere-Vegetative:Conventional:Bulk soil	-0.235258	-0.683125	0.212609	0.751853
Harvesting:Conservation:Rhizosphere-Flowering:Conservation:Rhizosphere	-0.513395	-0.961262	-0.0655278	0.0153457
Vegetative:Conservation:Rhizosphere-Flowering:Conservation:Rhizosphere	-0.0106825	-0.45855	0.437185	1
Flowering:Conventional:Rhizosphere-Flowering:Conservation:Rhizosphere	0.125537	-0.322331	0.573404	0.995843
Harvesting:Conventional:Rhizosphere-Flowering:Conservation:Rhizosphere	-0.0237677	-0.471635	0.4241	1
Vegetative:Conventional:Rhizosphere-Flowering:Conservation:Rhizosphere	-0.0587504	-0.506618	0.389117	0.999997
Vegetative:Conservation:Rhizosphere-Harvesting:Conservation:Rhizosphere	0.502713	0.0548453	0.95058	0.0187013
Flowering:Conventional:Rhizosphere-Harvesting:Conservation:Rhizosphere	0.638932	0.191065	1.0868	0.0013882
Harvesting:Conventional:Rhizosphere-Harvesting:Conservation:Rhizosphere	0.489627	0.04176	0.937495	0.0237701
Vegetative:Conventional:Rhizosphere-Harvesting:Conservation:Rhizosphere	0.454645	0.00677733	0.902512	0.044431
Flowering:Conventional:Rhizosphere-Vegetative:Conservation:Rhizosphere	0.136219	-0.311648	0.584087	0.991923
Harvesting:Conventional:Rhizosphere-Vegetative:Conservation:Rhizosphere	-0.0130852	-0.460953	0.434782	1
Vegetative:Conventional:Rhizosphere-Vegetative:Conservation:Rhizosphere	-0.0480679	-0.495935	0.399799	1
Harvesting:Conventional:Rhizosphere-Flowering:Conventional:Rhizosphere	-0.149305	-0.597172	0.298563	0.983634
Vegetative:Conventional:Rhizosphere-Flowering:Conventional:Rhizosphere	-0.184287	-0.632155	0.26358	0.931255
Vegetative:Conventional:Rhizosphere-Harvesting:Conventional:Rhizosphere	-0.0349827	-0.48285	0.412885	1

## Sheet: WS-5
Beta Diversity
Bray Curtis (BC) distance									Weighted Unifrac (WU) distance
Adonis									Adonis
Permutation: free									Permutation: free
Number of permutations: 5000									Number of permutations: 5000
Vegetative stage									Vegetative stage
	Df	Sums of Sqs	MeanSqs	F.Model	R2	Pr(>F)				Df	Sums of Sqs	MeanSqs	F.Model	R2	Pr(>F)
Tillage	1	0.09634	0.09634	2.17617	0.17294	0.03799	*		Tillage	1	0.010792	0.010792	2.85123	0.20761	0.0118	*
Microhabitats	1	0.06777	0.067768	1.53077	0.14905	0.05719			Microhabitats	1	0.007748	0.0077477	2.04693	0.14265	0.0591	.
Microhabitats:Tillage	1	0.03879	0.038787	0.87614	0.06963	0.4989			Microhabitats:Tillage	1	0.003161	0.0031611	0.83515	0.06081	0.55929
Residuals	8	0.35416	0.04427		0.63577				Residuals	8	0.03028	0.003785		0.58252
Total	11	0.55706			1				Total	11	0.051981			1
Signif. codes: 0 ‘***’ 0.001 ‘**’ 0.01 ‘*’ 0.05 ‘.’ 0.1 ‘ ’ 1									Signif. codes: 0 ‘***’ 0.001 ‘**’ 0.01 ‘*’ 0.05 ‘.’ 0.1 ‘ ’ 1
Flowering stage									Flowering stage
	Df	Sums of Sqs	MeanSqs	F.Model	R2	Pr(>F)				Df	Sums of Sqs	MeanSqs	F.Model	R2	Pr(>F)
Tillage	1	0.04213	0.042132	0.77344	0.07936	0.5707			Tillage	1	0.003114	0.0031136	0.59863	0.06048	0.7467
Microhabitats	1	0.03049	0.030486	0.55965	0.05742	0.8048			Microhabitats	1	0.004222	0.0042224	0.81182	0.08202	0.5681
Microhabitats:Tillage	1	0.02248	0.022479	0.41266	0.04234	0.956			Microhabitats:Tillage	1	0.002537	0.002537	0.48777	0.04928	0.863
Residuals	8	0.43578	0.054473		0.82087				Residuals	8	0.041609	0.0052012		0.80823
Total	11	0.53088			1				Total	11	0.051482			1
Signif. codes: 0 ‘***’ 0.001 ‘**’ 0.01 ‘*’ 0.05 ‘.’ 0.1 ‘ ’ 1									Signif. codes: 0 ‘***’ 0.001 ‘**’ 0.01 ‘*’ 0.05 ‘.’ 0.1 ‘ ’ 1
Harvesting stage									Harvesting stage
	Df	Sums of Sqs	MeanSqs	F.Model	R2	Pr(>F)				Df	Sums of Sqs	MeanSqs	F.Model	R2	Pr(>F)
Tillage	1	0.06063	0.060633	2.37865	0.21481	0.02336	*		Tillage	1	0.030014	0.0300139	3.5583	0.21531	0.0142	*
Microhabitats	1	0.05035	0.05035	2.87345	0.20603	0.02178	*		Microhabitats	1	0.0301	0.0300996	3.5685	0.21592	0.0164	*
Microhabitats:Tillage	1	0.06067	0.060668	0.75602	0.06296	0.61868			Microhabitats:Tillage	1	0.011807	0.0118068	1.3998	0.0847	0.3233
Residuals	8	0.64198	0.080247		0.66621				Residuals	8	0.067479	0.0084349		0.48407
Total	11	0.96363			1				Total	11	0.139399			1
Signif. codes: 0 ‘***’ 0.001 ‘**’ 0.01 ‘*’ 0.05 ‘.’ 0.1 ‘ ’ 1									Signif. codes: 0 ‘***’ 0.001 ‘**’ 0.01 ‘*’ 0.05 ‘.’ 0.1 ‘ ’ 1

## Sheet: WS-7
Growth stages effect (Veg vs Flower vs Harvest)
Conventional tillage (CT)
Rhizosphere
Vegetative (V1) vs Flowering (F1)
V1 enriched: 1
	baseMean	log2FoldChange	lfcSE	stat	pvalue	padj	Kingdom	Phylum	Class	Order	Family	Genus	Species
OTU341	5.72667	-20.3184	3.93653	-5.16151	2.44964e-07	0.00087648	k__Bacteria	p__Bacteroidetes	c__Cytophagia	o__Cytophagales	f__Cyclobacteriaceae	g__	s__
F1 enriched: 0
Flowering (F2) vs Harvesting (H1)
F2 enriched: 3
	baseMean	log2FoldChange	lfcSE	stat	pvalue	padj	Kingdom	Phylum	Class	Order	Family	Genus	Species
OTU6	233.513	-2.69792	0.787488	-3.42598	0.000612578	0.0379798	k__Bacteria	p__Proteobacteria	c__Alphaproteobacteria	o__Sphingomonadales	f__Sphingomonadaceae	g__Sphingomonas	s__
OTU70	66.4053	-3.01737	0.727244	-4.14905	3.33852e-05	0.00827952	k__Bacteria	p__Proteobacteria	c__Alphaproteobacteria	o__Rhizobiales	f__Rhizobiaceae	g__Agrobacterium	s__
OTU47	56.7084	-2.26995	0.660101	-3.43879	0.000584322	0.0379798	k__Bacteria	p__Actinobacteria	c__Actinobacteria	o__Actinomycetales	f__Nocardiaceae	g__Rhodococcus	s__fascians
H1 enriched: 1
	baseMean	log2FoldChange	lfcSE	stat	pvalue	padj	Kingdom	Phylum	Class	Order	Family	Genus	Species
OTU14	191.553	3.17171	0.818433	3.87534	0.000106476	0.013203	k__Bacteria	p__Bacteroidetes	c__Flavobacteriia	o__Flavobacteriales	f__Flavobacteriaceae	g__Flavobacterium	s__
Harvesting (H2) vs Vegetative (V2)
H2 enriched: 0
V2 enriched: 1
	baseMean	log2FoldChange	lfcSE	stat	pvalue	padj	Kingdom	Phylum	Class	Order	Family	Genus	Species
OTU341	5.72667	19.1062	3.95008	4.83692	1.31868e-06	0.00471823	k__Bacteria	p__Bacteroidetes	c__Cytophagia	o__Cytophagales	f__Cyclobacteriaceae	g__	s__
Growth stages effect (Vegetative stage vs Flowering stage vs Harvesting stage)
Conservation tillage (ST)
Rhizosphere
Vegetative (V1) vs Flowering (F1)
V1 enriched: 0
F1 enriched: 0
Flowering (F2) vs Harvesting (H1)
F2 enriched: 60
	baseMean	log2FoldChange	lfcSE	stat	pvalue	padj	Kingdom	Phylum	Class	Order	Family	Genus	Species
OTU881	3.34994	-4.03894	1.26182	-3.20087	0.00137011	0.0341158	k__Bacteria	p__TM7	c__TM7-1	o__	f__	g__	s__
OTU776	3.18727	-7.62973	1.86496	-4.0911	4.29337e-05	0.00246704	k__Bacteria	p__TM7	c__TM7-3	o__EW055	f__	g__	s__
OTU1705	3.21523	-3.64531	1.09494	-3.32924	0.000870846	0.0250201	k__Bacteria	p__Verrucomicrobia	c__[Spartobacteria]	o__[Chthoniobacterales]	f__[Chthoniobacteraceae]	g__DA101	s__
OTU321	29.6612	-1.66442	0.428441	-3.88482	0.000102405	0.00537909	k__Bacteria	p__Verrucomicrobia	c__[Spartobacteria]	o__[Chthoniobacterales]	f__[Chthoniobacteraceae]	g__DA101	s__
OTU261	20.3379	-1.97322	0.635309	-3.10592	0.00189686	0.0425523	k__Bacteria	p__Verrucomicrobia	c__[Spartobacteria]	o__[Chthoniobacterales]	f__[Chthoniobacteraceae]	g__DA101	s__
OTU960	1.92796	-5.33177	1.44453	-3.691	0.000223371	0.00834292	k__Bacteria	p__Verrucomicrobia	c__Verrucomicrobiae	o__Verrucomicrobiales	f__Verrucomicrobiaceae	g__Prosthecobacter	s__
OTU271	28.2387	-1.41353	0.410382	-3.44443	0.000572264	0.0185861	k__Bacteria	p__Firmicutes	c__Bacilli	o__Bacillales	f__Bacillaceae	g__Bacillus	s__
OTU180	12.746	-3.81851	0.915047	-4.17303	3.0058e-05	0.00195246	k__Bacteria	p__Firmicutes	c__Bacilli	o__Bacillales	f__Bacillaceae	g__	s__
OTU2943	2.16162	-4.09799	1.22309	-3.35051	0.000806641	0.0236298	k__Bacteria	p__Firmicutes	c__Bacilli	o__Bacillales	f__Paenibacillaceae	g__Paenibacillus	s__
OTU884	3.48141	-6.91345	2.133	-3.24118	0.00119036	0.0306622	k__Bacteria	p__Acidobacteria	c__Acidobacteriia	o__Acidobacteriales	f__Acidobacteriaceae	g__	s__
OTU299	20.0266	-4.00755	0.642684	-6.23564	4.49924e-10	1.68047e-07	k__Bacteria	p__Bacteroidetes	c__Cytophagia	o__Cytophagales	f__Cytophagaceae	g__Dyadobacter	s__
OTU789	9.50677	-4.32898	0.988181	-4.38075	1.1827e-05	0.000841405	k__Bacteria	p__Bacteroidetes	c__Cytophagia	o__Cytophagales	f__Cytophagaceae	g__Dyadobacter	s__
OTU2174	4.22189	-6.15416	1.81258	-3.39526	0.000685646	0.0213407	k__Bacteria	p__Bacteroidetes	c__Cytophagia	o__Cytophagales	f__Cytophagaceae	g__Hymenobacter	s__
OTU1754	5.73939	-3.51282	1.05896	-3.31725	0.00090909	0.0251515	k__Bacteria	p__Bacteroidetes	c__Sphingobacteriia	o__Sphingobacteriales	f__Sphingobacteriaceae	g__	s__
OTU16	81.7166	-7.91304	0.997233	-7.935	2.105e-15	3.14488e-12	k__Bacteria	p__Bacteroidetes	c__Sphingobacteriia	o__Sphingobacteriales	f__Sphingobacteriaceae	g__Pedobacter	s__
OTU64	116.68	-5.25828	1.13168	-4.64642	3.37743e-06	0.000297189	k__Bacteria	p__Bacteroidetes	c__Sphingobacteriia	o__Sphingobacteriales	f__Sphingobacteriaceae	g__Pedobacter	s__
OTU13	83.5629	-11.0283	3.49726	-3.15341	0.00161376	0.0390838	k__Bacteria	p__Bacteroidetes	c__Sphingobacteriia	o__Sphingobacteriales	f__Sphingobacteriaceae	g__Pedobacter	s__
OTU1379	7.8166	-4.34644	1.1307	-3.84403	0.00012103	0.00547935	k__Bacteria	p__Bacteroidetes	c__Sphingobacteriia	o__Sphingobacteriales	f__Sphingobacteriaceae	g__Pedobacter	s__
OTU2544	10.7762	-4.25362	0.803928	-5.29105	1.21619e-07	2.27124e-05	k__Bacteria	p__Bacteroidetes	c__Sphingobacteriia	o__Sphingobacteriales	f__Sphingobacteriaceae	g__Pedobacter	s__
OTU284	14.1674	-9.97227	2.46836	-4.04003	5.34436e-05	0.00295721	k__Bacteria	p__Bacteroidetes	c__Flavobacteriia	o__Flavobacteriales	f__[Weeksellaceae]	g__Chryseobacterium	s__
OTU175	22.1423	-10.7339	2.10649	-5.09564	3.47573e-07	4.72067e-05	k__Bacteria	p__Bacteroidetes	c__Flavobacteriia	o__Flavobacteriales	f__[Weeksellaceae]	g__Chryseobacterium	s__
OTU466	5.53819	-2.41565	0.772292	-3.1279	0.00176061	0.0414051	k__Bacteria	p__Bacteroidetes	c__[Saprospirae]	o__[Saprospirales]	f__Chitinophagaceae	g__	s__
OTU60	76.3169	-1.29323	0.420426	-3.07601	0.00209793	0.0447758	k__Bacteria	p__Acidobacteria	c__[Chloracidobacteria]	o__RB41	f__Ellin6075	g__	s__
OTU6	233.513	-6.11986	0.788194	-7.7644	8.20323e-15	6.12781e-12	k__Bacteria	p__Proteobacteria	c__Alphaproteobacteria	o__Sphingomonadales	f__Sphingomonadaceae	g__Sphingomonas	s__
OTU29	271.208	-2.70742	0.420446	-6.4394	1.19945e-10	5.97325e-08	k__Bacteria	p__Proteobacteria	c__Alphaproteobacteria	o__Sphingomonadales	f__Sphingomonadaceae	g__	s__
OTU802	94.3456	-2.59167	0.460291	-5.63049	1.79697e-08	4.47445e-06	k__Bacteria	p__Proteobacteria	c__Alphaproteobacteria	o__Sphingomonadales	f__Sphingomonadaceae	g__Kaistobacter	s__
OTU17	197.546	-3.08553	0.631976	-4.88235	1.04827e-06	0.000104408	k__Bacteria	p__Proteobacteria	c__Alphaproteobacteria	o__Sphingomonadales	f__Sphingomonadaceae	g__Kaistobacter	s__
OTU54	38.178	-3.54736	1.06927	-3.31757	0.000908045	0.0251515	k__Bacteria	p__Proteobacteria	c__Alphaproteobacteria	o__Sphingomonadales	f__Erythrobacteraceae	g__	s__
OTU304	17.6837	-3.31034	0.653954	-5.06204	4.14795e-07	5.1642e-05	k__Bacteria	p__Proteobacteria	c__Alphaproteobacteria	o__Sphingomonadales	f__Sphingomonadaceae	g__	s__
OTU192	13.9228	-3.43623	0.885604	-3.8801	0.000104413	0.00537909	k__Bacteria	p__Proteobacteria	c__Alphaproteobacteria	o__Sphingomonadales	f__Sphingomonadaceae	g__Sphingopyxis	s__alaskensis
OTU547	21.2522	-2.03092	0.624806	-3.25047	0.00115213	0.0306332	k__Bacteria	p__Proteobacteria	c__Alphaproteobacteria	o__Sphingomonadales	f__Sphingomonadaceae	g__Sphingomonas	s__wittichii
OTU440	21.6858	-2.97515	0.773475	-3.84648	0.000119828	0.00547935	k__Bacteria	p__Proteobacteria	c__Alphaproteobacteria	o__Sphingomonadales	f__Sphingomonadaceae	g__Kaistobacter	s__
OTU1276	5.93783	-3.01518	0.928775	-3.2464	0.00116874	0.0306332	k__Bacteria	p__Proteobacteria	c__Alphaproteobacteria	o__Caulobacterales	f__Caulobacteraceae	g__	s__
OTU159	18.3243	-6.8202	1.64097	-4.15619	3.23592e-05	0.00201436	k__Bacteria	p__Proteobacteria	c__Alphaproteobacteria	o__Caulobacterales	f__Caulobacteraceae	g__	s__
OTU862	13.0776	-4.31166	0.928005	-4.64616	3.38167e-06	0.000297189	k__Bacteria	p__Proteobacteria	c__Alphaproteobacteria	o__Caulobacterales	f__Caulobacteraceae	g__Mycoplana	s__
OTU338	12.1392	-4.18197	1.10402	-3.78796	0.000151892	0.00635066	k__Bacteria	p__Proteobacteria	c__Alphaproteobacteria	o__Rhizobiales	f__Methylobacteriaceae	g__Methylobacterium	s__adhaesivum
OTU26	92.535	-0.888929	0.286368	-3.10414	0.0019083	0.0425523	k__Bacteria	p__Proteobacteria	c__Alphaproteobacteria	o__Rhizobiales	f__Phyllobacteriaceae	g__	s__
OTU663	4.06888	-5.01782	1.48286	-3.38388	0.000714703	0.0213553	k__Bacteria	p__Proteobacteria	c__Alphaproteobacteria	o__Rhizobiales	f__Aurantimonadaceae	g__	s__
OTU58	50.7444	-1.39095	0.434522	-3.2011	0.00136903	0.0341158	k__Bacteria	p__Proteobacteria	c__Alphaproteobacteria	o__Rhizobiales	f__Rhizobiaceae
OTU70	66.4053	-3.66686	0.712503	-5.14644	2.65475e-07	4.40688e-05	k__Bacteria	p__Proteobacteria	c__Alphaproteobacteria	o__Rhizobiales	f__Rhizobiaceae	g__Agrobacterium	s__
OTU265	14.2225	-4.88329	1.26197	-3.86956	0.00010903	0.00542971	k__Bacteria	p__Proteobacteria	c__Alphaproteobacteria	o__Rhodobacterales	f__Rhodobacteraceae	g__Rhodobacter	s__
OTU399	10.3525	-4.3088	1.05058	-4.10137	4.10712e-05	0.00245442	k__Bacteria	p__Proteobacteria	c__Gammaproteobacteria	o__Pseudomonadales	f__Pseudomonadaceae	g__Pseudomonas	s__
OTU157	34.1854	-6.14933	1.09195	-5.63152	1.78627e-08	4.47445e-06	k__Bacteria	p__Proteobacteria	c__Gammaproteobacteria	o__Pseudomonadales	f__Pseudomonadaceae	g__Pseudomonas	s__viridiflava
OTU31	120.407	-3.7345	0.729488	-5.11935	3.06587e-07	4.58041e-05	k__Bacteria	p__Proteobacteria	c__Gammaproteobacteria	o__Pseudomonadales	f__Pseudomonadaceae	g__Pseudomonas
OTU678	5.85869	-3.25568	0.996831	-3.26603	0.00109067	0.0296266	k__Bacteria	p__Proteobacteria	c__Gammaproteobacteria	o__Xanthomonadales	f__Xanthomonadaceae	g__	s__
OTU155	15.9125	-10.2034	3.00475	-3.39577	0.000684361	0.0213407	k__Bacteria	p__Proteobacteria	c__Gammaproteobacteria	o__Xanthomonadales	f__Xanthomonadaceae	g__	s__
OTU345	9.74801	-3.40164	0.976967	-3.48184	0.000497982	0.0169088	k__Bacteria	p__Proteobacteria	c__Gammaproteobacteria	o__Xanthomonadales	f__Xanthomonadaceae
OTU603	8.69981	-2.68391	0.711751	-3.77085	0.000162692	0.00639636	k__Bacteria	p__Proteobacteria	c__Gammaproteobacteria	o__Xanthomonadales	f__Xanthomonadaceae	g__	s__
OTU156	38.584	-1.97794	0.431201	-4.58706	4.49533e-06	0.000373113	k__Bacteria	p__Proteobacteria	c__Gammaproteobacteria	o__Xanthomonadales	f__Xanthomonadaceae	g__	s__
OTU358	14.0409	-1.60319	0.514171	-3.11801	0.00182076	0.0418494	k__Bacteria	p__Proteobacteria	c__Betaproteobacteria	o__Burkholderiales	f__Comamonadaceae	g__Methylibium	s__
OTU212	37.7362	-2.67377	0.479562	-5.57544	2.46902e-08	5.2696e-06	k__Bacteria	p__Proteobacteria	c__Betaproteobacteria	o__Burkholderiales	f__Comamonadaceae	g__	s__
OTU405	11.8835	-2.971	0.667436	-4.45136	8.53265e-06	0.000637389	k__Bacteria	p__Actinobacteria	c__Actinobacteria	o__Actinomycetales	f__Actinosynnemataceae	g__	s__
OTU47	56.7084	-3.43132	0.685003	-5.0092	5.46567e-07	5.83265e-05	k__Bacteria	p__Actinobacteria	c__Actinobacteria	o__Actinomycetales	f__Nocardiaceae	g__Rhodococcus	s__fascians
OTU844	3.19191	-3.654	1.07964	-3.38446	0.000713192	0.0213553	k__Bacteria	p__Actinobacteria	c__Actinobacteria	o__Actinomycetales	f__Nocardiaceae	g__Rhodococcus	s__
OTU62	115.58	-0.952685	0.270165	-3.52631	0.000421401	0.0146412	k__Bacteria	p__Actinobacteria	c__Actinobacteria	o__Actinomycetales	f__Streptomycetaceae	g__Streptomyces	s__
OTU274	26.4602	-2.14307	0.576915	-3.7147	0.000203441	0.00779337	k__Bacteria	p__Actinobacteria	c__Actinobacteria	o__Actinomycetales	f__Sporichthyaceae	g__	s__
OTU3	376.707	-1.54021	0.340597	-4.52209	6.12328e-06	0.000481483	k__Bacteria	p__Actinobacteria	c__Actinobacteria	o__Actinomycetales	f__Micrococcaceae	g__	s__
OTU264	15.3646	-2.90593	0.769727	-3.77528	0.000159831	0.00639636	k__Bacteria	p__Actinobacteria	c__Actinobacteria	o__Actinomycetales	f__Micrococcaceae	g__Arthrobacter	s__
OTU2516	12.0631	-3.97597	0.793074	-5.01337	5.34858e-07	5.83265e-05	k__Bacteria	p__Actinobacteria	c__Actinobacteria	o__Actinomycetales	f__Microbacteriaceae
OTU232	86.8784	-1.80713	0.43292	-4.1743	2.9891e-05	0.00195246	k__Bacteria	p__Actinobacteria	c__Actinobacteria	o__Actinomycetales	f__Microbacteriaceae	g__	s__
H1 enriched: 11
	baseMean	log2FoldChange	lfcSE	stat	pvalue	padj	Kingdom	Phylum	Class	Order	Family	Genus	Species
OTU253	36.1738	1.6053	0.509307	3.15193	0.00162195	0.0390838	k__Bacteria	p__Verrucomicrobia	c__[Pedosphaerae]	o__[Pedosphaerales]	f__auto67_4W	g__	s__
OTU102	13.7322	4.78565	1.55338	3.0808	0.00206443	0.0446994	k__Bacteria	p__Bacteroidetes	c__Cytophagia	o__Cytophagales	f__Cytophagaceae	g__Cytophaga	s__
OTU309	9.41408	2.90972	0.941508	3.09049	0.00199829	0.0439035	k__Bacteria	p__Bacteroidetes	c__Cytophagia	o__Cytophagales	f__Cytophagaceae	g__	s__
OTU266	15.6565	4.24736	1.16286	3.65251	0.000259688	0.00946276	k__Bacteria	p__Bacteroidetes	c__Cytophagia	o__Cytophagales	f__Cytophagaceae	g__	s__
OTU471	9.62209	4.36224	1.20272	3.62697	0.000286771	0.0102009	k__Bacteria	p__Gemmatimonadetes	c__Gemm-1	o__	f__	g__	s__
OTU608	4.42542	4.60571	1.19539	3.85289	0.000116733	0.00547935	k__Bacteria	p__Proteobacteria	c__Gammaproteobacteria	o__Alteromonadales	f__Alteromonadaceae	g__Cellvibrio	s__
OTU136	24.8946	4.61369	1.51256	3.05025	0.0022865	0.0481132	k__Bacteria	p__Proteobacteria	c__Betaproteobacteria	o__Burkholderiales	f__Oxalobacteraceae	g__	s__
OTU325	7.55871	5.37867	1.72078	3.12572	0.00177371	0.0414051	k__Bacteria	p__Nitrospirae	c__Nitrospira	o__Nitrospirales	f__Nitrospiraceae	g__	s__
OTU61	82.0657	0.876151	0.252887	3.46459	0.000531039	0.0176305	k__Bacteria	p__Actinobacteria	c__Thermoleophilia	o__Gaiellales	f__Gaiellaceae	g__	s__
OTU11	127.404	1.06755	0.27889	3.82784	0.000129272	0.00568038	k__Bacteria	p__Actinobacteria	c__Thermoleophilia	o__Gaiellales	f__Gaiellaceae	g__	s__
OTU97	52.0211	1.12085	0.296042	3.7861	0.000153028	0.00635066	k__Bacteria	p__Actinobacteria	c__Actinobacteria	o__Actinomycetales	f__Nocardioidaceae	g__	s__
Harvesting (H2) vs Vegetative (V2)
H2 enriched: 5
	baseMean	log2FoldChange	lfcSE	stat	pvalue	padj	Kingdom	Phylum	Class	Order	Family	Genus	Species
OTU1260	3.49025	-4.45356	1.44216	-3.08812	0.00201429	0.0462962	k__Bacteria	p__Fibrobacteres	c__Fibrobacteria	o__258ds10	f__	g__	s__
OTU102	13.7322	-5.12202	1.54973	-3.3051	0.000949409	0.0245983	k__Bacteria	p__Bacteroidetes	c__Cytophagia	o__Cytophagales	f__Cytophagaceae	g__Cytophaga	s__
OTU1129	5.17307	-4.2715	1.34903	-3.16635	0.00154363	0.0379253	k__Bacteria	p__Chloroflexi	c__Anaerolineae	o__envOPS12	f__	g__	s__
OTU11	127.404	-0.985094	0.277379	-3.55144	0.000383132	0.0129991	k__Bacteria	p__Actinobacteria	c__Thermoleophilia	o__Gaiellales	f__Gaiellaceae	g__	s__
OTU97	52.0211	-1.12865	0.292071	-3.86429	0.000111414	0.00516834	k__Bacteria	p__Actinobacteria	c__Actinobacteria	o__Actinomycetales	f__Nocardioidaceae	g__	s__
V2 enriched: 57
	baseMean	log2FoldChange	lfcSE	stat	pvalue	padj	Kingdom	Phylum	Class	Order	Family	Genus	Species
OTU418	13.0781	3.84739	0.941065	4.08834	4.34475e-05	0.00238126	k__Bacteria	p__TM7	c__TM7-3	o__	f__	g__	s__
OTU776	3.18727	6.50359	1.77676	3.66037	0.000251852	0.0095104	k__Bacteria	p__TM7	c__TM7-3	o__EW055	f__	g__	s__
OTU271	28.2387	1.52784	0.404794	3.77438	0.000160407	0.00672295	k__Bacteria	p__Firmicutes	c__Bacilli	o__Bacillales	f__Bacillaceae	g__Bacillus	s__
OTU180	12.746	3.77564	0.900652	4.19212	2.76362e-05	0.00179007	k__Bacteria	p__Firmicutes	c__Bacilli	o__Bacillales	f__Bacillaceae	g__	s__
OTU2943	2.16162	3.94084	1.13262	3.4794	0.000502529	0.0159134	k__Bacteria	p__Firmicutes	c__Bacilli	o__Bacillales	f__Paenibacillaceae	g__Paenibacillus	s__
OTU299	20.0266	3.41496	0.61498	5.55296	2.80871e-08	5.71774e-06	k__Bacteria	p__Bacteroidetes	c__Cytophagia	o__Cytophagales	f__Cytophagaceae	g__Dyadobacter	s__
OTU789	9.50677	4.54144	0.975645	4.65481	3.24275e-06	0.000330065	k__Bacteria	p__Bacteroidetes	c__Cytophagia	o__Cytophagales	f__Cytophagaceae	g__Dyadobacter	s__
OTU1754	5.73939	3.36822	1.02102	3.29887	0.000970746	0.024702	k__Bacteria	p__Bacteroidetes	c__Sphingobacteriia	o__Sphingobacteriales	f__Sphingobacteriaceae	g__	s__
OTU255	11.1475	3.67783	1.04751	3.51102	0.000446383	0.0144567	k__Bacteria	p__Bacteroidetes	c__Sphingobacteriia	o__Sphingobacteriales	f__Sphingobacteriaceae	g__	s__
OTU16	81.7166	8.01312	0.977007	8.20171	2.36996e-16	3.37719e-13	k__Bacteria	p__Bacteroidetes	c__Sphingobacteriia	o__Sphingobacteriales	f__Sphingobacteriaceae	g__Pedobacter	s__
OTU64	116.68	6.9851	1.14351	6.10849	1.00577e-09	4.77743e-07	k__Bacteria	p__Bacteroidetes	c__Sphingobacteriia	o__Sphingobacteriales	f__Sphingobacteriaceae	g__Pedobacter	s__
OTU13	83.5629	12.2407	3.53145	3.4662	0.000527878	0.0163527	k__Bacteria	p__Bacteroidetes	c__Sphingobacteriia	o__Sphingobacteriales	f__Sphingobacteriaceae	g__Pedobacter	s__
OTU1379	7.8166	5.39145	1.17021	4.60727	4.07987e-06	0.000387588	k__Bacteria	p__Bacteroidetes	c__Sphingobacteriia	o__Sphingobacteriales	f__Sphingobacteriaceae	g__Pedobacter	s__
OTU2544	10.7762	4.5259	0.792479	5.71106	1.12275e-08	2.66653e-06	k__Bacteria	p__Bacteroidetes	c__Sphingobacteriia	o__Sphingobacteriales	f__Sphingobacteriaceae	g__Pedobacter	s__
OTU181	13.6176	8.31465	2.33753	3.55702	0.000375081	0.0129991	k__Bacteria	p__Bacteroidetes	c__Flavobacteriia	o__Flavobacteriales	f__Flavobacteriaceae	g__Flavobacterium	s__
OTU284	14.1674	9.45234	2.4553	3.84976	0.000118233	0.00526505	k__Bacteria	p__Bacteroidetes	c__Flavobacteriia	o__Flavobacteriales	f__[Weeksellaceae]	g__Chryseobacterium	s__
OTU175	22.1423	10.2233	2.09169	4.88755	1.02096e-06	0.000111913	k__Bacteria	p__Bacteroidetes	c__Flavobacteriia	o__Flavobacteriales	f__[Weeksellaceae]	g__Chryseobacterium	s__
OTU488	6.8822	5.10013	1.49345	3.415	0.000637831	0.0189356	k__Bacteria	p__Bacteroidetes	c__[Saprospirae]	o__[Saprospirales]	f__Chitinophagaceae	g__	s__
OTU2413	5.74971	2.31067	0.741804	3.11494	0.00183983	0.0429796	k__Bacteria	p__Bacteroidetes	c__[Saprospirae]	o__[Saprospirales]	f__Chitinophagaceae	g__	s__
OTU2967	7.55936	2.04751	0.617066	3.31814	0.000906204	0.0243649	k__Bacteria	p__Acidobacteria	c__[Chloracidobacteria]	o__PK29	f__	g__	s__
OTU6	233.513	5.94389	0.783645	7.58493	3.32666e-14	2.37024e-11	k__Bacteria	p__Proteobacteria	c__Alphaproteobacteria	o__Sphingomonadales	f__Sphingomonadaceae	g__Sphingomonas	s__
OTU29	271.208	2.23545	0.417807	5.35045	8.7736e-08	1.25024e-05	k__Bacteria	p__Proteobacteria	c__Alphaproteobacteria	o__Sphingomonadales	f__Sphingomonadaceae	g__	s__
OTU802	94.3456	2.02983	0.452873	4.48212	7.39063e-06	0.000619509	k__Bacteria	p__Proteobacteria	c__Alphaproteobacteria	o__Sphingomonadales	f__Sphingomonadaceae	g__Kaistobacter	s__
OTU17	197.546	2.60939	0.62897	4.14867	3.3441e-05	0.00207189	k__Bacteria	p__Proteobacteria	c__Alphaproteobacteria	o__Sphingomonadales	f__Sphingomonadaceae	g__Kaistobacter	s__
OTU54	38.178	3.90553	1.0675	3.65859	0.000253611	0.0095104	k__Bacteria	p__Proteobacteria	c__Alphaproteobacteria	o__Sphingomonadales	f__Erythrobacteraceae	g__	s__
OTU304	17.6837	2.36853	0.608823	3.89034	0.000100105	0.00491894	k__Bacteria	p__Proteobacteria	c__Alphaproteobacteria	o__Sphingomonadales	f__Sphingomonadaceae	g__	s__
OTU192	13.9228	5.87894	0.977093	6.01677	1.77931e-09	6.3388e-07	k__Bacteria	p__Proteobacteria	c__Alphaproteobacteria	o__Sphingomonadales	f__Sphingomonadaceae	g__Sphingopyxis	s__alaskensis
OTU547	21.2522	2.18615	0.620283	3.52444	0.000424386	0.0140639	k__Bacteria	p__Proteobacteria	c__Alphaproteobacteria	o__Sphingomonadales	f__Sphingomonadaceae	g__Sphingomonas	s__wittichii
OTU2512	2.22774	7.71663	2.31639	3.33132	0.000864343	0.0236863	k__Bacteria	p__Proteobacteria	c__Alphaproteobacteria	o__Sphingomonadales	f__Sphingomonadaceae	g__Sphingomonas	s__wittichii
OTU1276	5.93783	3.85579	0.961035	4.01212	6.01761e-05	0.00306253	k__Bacteria	p__Proteobacteria	c__Alphaproteobacteria	o__Caulobacterales	f__Caulobacteraceae	g__	s__
OTU159	18.3243	6.41224	1.58202	4.05319	5.05229e-05	0.00266649	k__Bacteria	p__Proteobacteria	c__Alphaproteobacteria	o__Caulobacterales	f__Caulobacteraceae	g__	s__
OTU862	13.0776	3.90469	0.88723	4.40099	1.0776e-05	0.000853101	k__Bacteria	p__Proteobacteria	c__Alphaproteobacteria	o__Caulobacterales	f__Caulobacteraceae	g__Mycoplana	s__
OTU73	25.9639	2.24933	0.671617	3.34913	0.000810646	0.0226504	k__Bacteria	p__Proteobacteria	c__Alphaproteobacteria	o__Caulobacterales	f__Caulobacteraceae	g__Caulobacter
OTU338	12.1392	4.01551	1.0701	3.75246	0.000175106	0.00712932	k__Bacteria	p__Proteobacteria	c__Alphaproteobacteria	o__Rhizobiales	f__Methylobacteriaceae	g__Methylobacterium	s__adhaesivum
OTU998	7.46021	2.75533	0.877242	3.1409	0.00168429	0.04068	k__Bacteria	p__Proteobacteria	c__Alphaproteobacteria	o__Rhizobiales	f__Hyphomicrobiaceae	g__Devosia	s__
OTU26	92.535	1.05224	0.283953	3.7057	0.000210809	0.00834451	k__Bacteria	p__Proteobacteria	c__Alphaproteobacteria	o__Rhizobiales	f__Phyllobacteriaceae	g__	s__
OTU58	50.7444	1.44905	0.430545	3.36563	0.000763703	0.0217655	k__Bacteria	p__Proteobacteria	c__Alphaproteobacteria	o__Rhizobiales	f__Rhizobiaceae
OTU70	66.4053	3.91453	0.710159	5.51219	3.54387e-08	6.31252e-06	k__Bacteria	p__Proteobacteria	c__Alphaproteobacteria	o__Rhizobiales	f__Rhizobiaceae	g__Agrobacterium	s__
OTU399	10.3525	4.18215	1.02205	4.09193	4.27794e-05	0.00238126	k__Bacteria	p__Proteobacteria	c__Gammaproteobacteria	o__Pseudomonadales	f__Pseudomonadaceae	g__Pseudomonas	s__
OTU157	34.1854	4.40979	1.04283	4.22867	2.35079e-05	0.00159518	k__Bacteria	p__Proteobacteria	c__Gammaproteobacteria	o__Pseudomonadales	f__Pseudomonadaceae	g__Pseudomonas	s__viridiflava
OTU31	120.407	3.66979	0.72734	5.0455	4.52338e-07	5.37151e-05	k__Bacteria	p__Proteobacteria	c__Gammaproteobacteria	o__Pseudomonadales	f__Pseudomonadaceae	g__Pseudomonas
OTU678	5.85869	3.26395	0.967747	3.37273	0.00074426	0.0216443	k__Bacteria	p__Proteobacteria	c__Gammaproteobacteria	o__Xanthomonadales	f__Xanthomonadaceae	g__	s__
OTU155	15.9125	10.6894	3.00475	3.55752	0.000374378	0.0129991	k__Bacteria	p__Proteobacteria	c__Gammaproteobacteria	o__Xanthomonadales	f__Xanthomonadaceae	g__	s__
OTU345	9.74801	3.1525	0.951597	3.31286	0.000923486	0.0243698	k__Bacteria	p__Proteobacteria	c__Gammaproteobacteria	o__Xanthomonadales	f__Xanthomonadaceae
OTU603	8.69981	2.49296	0.683924	3.64508	0.000267309	0.00976706	k__Bacteria	p__Proteobacteria	c__Gammaproteobacteria	o__Xanthomonadales	f__Xanthomonadaceae	g__	s__
OTU156	38.584	1.59195	0.420047	3.78995	0.00015068	0.00650665	k__Bacteria	p__Proteobacteria	c__Gammaproteobacteria	o__Xanthomonadales	f__Xanthomonadaceae	g__	s__
OTU2808	21.7224	1.51483	0.439759	3.44468	0.000571735	0.0173345	k__Bacteria	p__Proteobacteria	c__Betaproteobacteria	o__Burkholderiales	f__Comamonadaceae
OTU358	14.0409	1.96683	0.50927	3.86206	0.000112434	0.00516834	k__Bacteria	p__Proteobacteria	c__Betaproteobacteria	o__Burkholderiales	f__Comamonadaceae	g__Methylibium	s__
OTU212	37.7362	2.39596	0.469959	5.09822	3.42855e-07	4.44153e-05	k__Bacteria	p__Proteobacteria	c__Betaproteobacteria	o__Burkholderiales	f__Comamonadaceae	g__	s__
OTU837	28.7765	1.26179	0.403356	3.12823	0.00175861	0.041767	k__Bacteria	p__Actinobacteria	c__Actinobacteria	o__Actinomycetales	f__Streptomycetaceae	g__Streptomyces	s__
OTU405	11.8835	4.13752	0.703331	5.88275	4.03494e-09	1.14996e-06	k__Bacteria	p__Actinobacteria	c__Actinobacteria	o__Actinomycetales	f__Actinosynnemataceae	g__	s__
OTU47	56.7084	2.91776	0.668215	4.36651	1.2625e-05	0.000946874	k__Bacteria	p__Actinobacteria	c__Actinobacteria	o__Actinomycetales	f__Nocardiaceae	g__Rhodococcus	s__fascians
OTU844	3.19191	3.04183	0.950181	3.20132	0.00136801	0.0342003	k__Bacteria	p__Actinobacteria	c__Actinobacteria	o__Actinomycetales	f__Nocardiaceae	g__Rhodococcus	s__
OTU62	115.58	1.14308	0.268012	4.26502	1.99883e-05	0.00142416	k__Bacteria	p__Actinobacteria	c__Actinobacteria	o__Actinomycetales	f__Streptomycetaceae	g__Streptomyces	s__
OTU274	26.4602	3.17116	0.589459	5.37978	7.45757e-08	1.18078e-05	k__Bacteria	p__Actinobacteria	c__Actinobacteria	o__Actinomycetales	f__Sporichthyaceae	g__	s__
OTU3	376.707	1.52512	0.339856	4.48755	7.20474e-06	0.000619509	k__Bacteria	p__Actinobacteria	c__Actinobacteria	o__Actinomycetales	f__Micrococcaceae	g__	s__
OTU2516	12.0631	3.04474	0.738688	4.12182	3.75897e-05	0.00223189	k__Bacteria	p__Actinobacteria	c__Actinobacteria	o__Actinomycetales	f__Microbacteriaceae

## Sheet: WS-8
Growth stages effect (Veg vs Flower vs Harvest)
Conventional tillage (CT)
Bulk soil
Vegetative (V1) vs Flowering (F1)
V1 enriched: 1
	baseMean	log2FoldChange	lfcSE	stat	pvalue	padj	Kingdom	Phylum	Class	Order	Family	Genus	Species
OTU341	5.72667	-18.6534	3.96407	-4.70562	2.53097e-06	0.00905582	k__Bacteria	p__Bacteroidetes	c__Cytophagia	o__Cytophagales	f__Cyclobacteriaceae	g__	s__
F1 enriched: 0
Flowering (F2) vs Harvesting (H1)
F2 enriched: 1
	baseMean	log2FoldChange	lfcSE	stat	pvalue	padj	Kingdom	Phylum	Class	Order	Family	Genus	Species
OTU153	10.1614	-7.55136	1.40468	-5.37584	7.62265e-08	0.000272739	k__Bacteria	p__TM7	c__TM7-3	o__I025	f__	g__	s__
H1 enriched: 0
Harvesting (H2) vs Vegetative (V2)
H2 enriched: 4
	baseMean	log2FoldChange	lfcSE	stat	pvalue	padj	Kingdom	Phylum	Class	Order	Family	Genus	Species
OTU354	21.6163	-2.09926	0.490736	-4.27778	1.88771e-05	0.00564047	k__Bacteria	p__Planctomycetes	c__Pla4	o__	f__	g__	s__
OTU309	9.41408	-4.16025	0.928432	-4.48094	7.43157e-06	0.00442879	k__Bacteria	p__Bacteroidetes	c__Cytophagia	o__Cytophagales	f__Cytophagaceae	g__	s__
OTU698	9.60357	-5.85835	1.36235	-4.30018	1.70659e-05	0.00564047	k__Bacteria	p__Gemmatimonadetes	c__Gemm-1	o__	f__	g__	s__
OTU374	10.3126	-2.56344	0.700379	-3.66007	0.000252146	0.0470883	k__Bacteria	p__Proteobacteria	c__Alphaproteobacteria	o__Rhodospirillales	f__Rhodospirillaceae	g__	s__
V2 enriched: 4
	baseMean	log2FoldChange	lfcSE	stat	pvalue	padj	Kingdom	Phylum	Class	Order	Family	Genus	Species
OTU153	10.1614	4.24	1.05678	4.01217	6.01631e-05	0.0149806	k__Bacteria	p__TM7	c__TM7-3	o__I025	f__	g__	s__
OTU341	5.72667	18.2635	3.97311	4.59679	4.29054e-06	0.00442879	k__Bacteria	p__Bacteroidetes	c__Cytophagia	o__Cytophagales	f__Cyclobacteriaceae	g__	s__
OTU62	115.58	1.04304	0.281191	3.70936	0.00020778	0.0443463	k__Bacteria	p__Actinobacteria	c__Actinobacteria	o__Actinomycetales	f__Streptomycetaceae	g__Streptomyces	s__
OTU274	26.4602	2.93617	0.660931	4.44247	8.89315e-06	0.00442879	k__Bacteria	p__Actinobacteria	c__Actinobacteria	o__Actinomycetales	f__Sporichthyaceae	g__	s__
Growth stages effect (Veg vs Flower vs Harvest)
Bulk soil
Conservation tillage (ST)
Vegetative (V1) vs Flowering (F1)
V1 enriched: 0
F1 enriched: 0
Flowering (F2) vs Harvesting (H1)
F2 enriched: 3
	baseMean	log2FoldChange	lfcSE	stat	pvalue	padj	Kingdom	Phylum	Class	Order	Family	Genus	Species
OTU802	94.3456	-2.03155	0.457413	-4.4414	8.93765e-06	0.00388341	k__Bacteria	p__Proteobacteria	c__Alphaproteobacteria	o__Sphingomonadales	f__Sphingomonadaceae	g__Kaistobacter	s__
OTU481	13.0105	-2.35681	0.630522	-3.73787	0.000185583	0.0403179	k__Bacteria	p__Proteobacteria	c__Alphaproteobacteria	o__Sphingomonadales	f__Sphingomonadaceae	g__Kaistobacter	s__
OTU399	10.3525	-4.13479	1.08992	-3.79366	0.000148445	0.0403179	k__Bacteria	p__Proteobacteria	c__Gammaproteobacteria	o__Pseudomonadales	f__Pseudomonadaceae	g__Pseudomonas	s__
H1 enriched: 1
	baseMean	log2FoldChange	lfcSE	stat	pvalue	padj	Kingdom	Phylum	Class	Order	Family	Genus	Species
OTU309	9.41408	6.54417	1.28943	5.07524	3.87008e-07	0.00033631	k__Bacteria	p__Bacteroidetes	c__Cytophagia	o__Cytophagales	f__Cytophagaceae	g__	s__
Harvesting (H2) vs Vegetative (V2)
H2 enriched: 0
V2 enriched: 0

## Sheet: WS-9
Tillge effect (CT vs ST)
Rhizosphere
Vegetative stage
Conventional tillage (CT): 0
Conservation tillage (ST): 0
Flowering stage
Conventional tillage (CT): 0
Conservation tillage (ST): 0
Harvesting stage
Conservation tillage (ST): 4
	baseMean	log2FoldChange	lfcSE	stat	pvalue	padj	Kingdom	Phylum	Class	Order	Family	Genus	Species
OTU253	36.1738	2.07839	0.522509	3.97771	6.95815e-05	0.00933386	k__Bacteria	p__Verrucomicrobia	c__[Pedosphaerae]	o__[Pedosphaerales]	f__auto67_4W	g__	s__
OTU266	15.6565	4.19238	1.18429	3.54	0.00040013	0.0208735	k__Bacteria	p__Bacteroidetes	c__Cytophagia	o__Cytophagales	f__Cytophagaceae	g__	s__
OTU471	9.62209	4.63395	1.22448	3.78442	0.000154067	0.0111284	k__Bacteria	p__Gemmatimonadetes	c__Gemm-1	o__	f__	g__	s__
OTU1129	5.17307	5.2727	1.36701	3.85711	0.000114736	0.00979428	k__Bacteria	p__Chloroflexi	c__Anaerolineae	o__envOPS12	f__	g__	s__
Conventional tillage (CT): 22
	baseMean	log2FoldChange	lfcSE	stat	pvalue	padj	Kingdom	Phylum	Class	Order	Family	Genus	Species
OTU271	28.2387	-1.50508	0.445462	-3.37869	0.000728325	0.0341948	k__Bacteria	p__Firmicutes	c__Bacilli	o__Bacillales	f__Bacillaceae	g__Bacillus	s__
OTU180	12.746	-4.95108	1.07847	-4.59083	4.41487e-06	0.00119894	k__Bacteria	p__Firmicutes	c__Bacilli	o__Bacillales	f__Bacillaceae	g__	s__
OTU299	20.0266	-3.48575	0.677707	-5.14345	2.69738e-07	0.000253284	k__Bacteria	p__Bacteroidetes	c__Cytophagia	o__Cytophagales	f__Cytophagaceae	g__Dyadobacter	s__
OTU789	9.50677	-3.33649	1.00797	-3.3101	0.000932636	0.0398066	k__Bacteria	p__Bacteroidetes	c__Cytophagia	o__Cytophagales	f__Cytophagaceae	g__Dyadobacter	s__
OTU16	81.7166	-2.95114	0.918126	-3.21431	0.00130758	0.0472238	k__Bacteria	p__Bacteroidetes	c__Sphingobacteriia	o__Sphingobacteriales	f__Sphingobacteriaceae	g__Pedobacter	s__
OTU2544	10.7762	-3.49615	0.837814	-4.17294	3.00691e-05	0.00484326	k__Bacteria	p__Bacteroidetes	c__Sphingobacteriia	o__Sphingobacteriales	f__Sphingobacteriaceae	g__Pedobacter	s__
OTU34	113.261	-2.89432	0.88939	-3.25428	0.00113679	0.0462928	k__Bacteria	p__Bacteroidetes	c__Flavobacteriia	o__Flavobacteriales	f__Flavobacteriaceae	g__Flavobacterium	s__succinicans
OTU65	59.6593	-1.6106	0.496656	-3.2429	0.0011832	0.0462928	k__Bacteria	p__Bacteroidetes	c__[Saprospirae]	o__[Saprospirales]	f__Chitinophagaceae	g__	s__
OTU50	42.1193	-1.65867	0.488038	-3.39865	0.000677199	0.0334679	k__Bacteria	p__Acidobacteria	c__[Chloracidobacteria]	o__RB41	f__Ellin6075	g__	s__
OTU2967	7.55936	-3.10223	0.873936	-3.54972	0.000385636	0.0208735	k__Bacteria	p__Acidobacteria	c__[Chloracidobacteria]	o__PK29	f__	g__	s__
OTU6	233.513	-2.8053	0.779588	-3.59844	0.000320129	0.0200401	k__Bacteria	p__Proteobacteria	c__Alphaproteobacteria	o__Sphingomonadales	f__Sphingomonadaceae	g__Sphingomonas	s__
OTU29	271.208	-1.35389	0.421072	-3.21535	0.00130286	0.0472238	k__Bacteria	p__Proteobacteria	c__Alphaproteobacteria	o__Sphingomonadales	f__Sphingomonadaceae	g__	s__
OTU802	94.3456	-2.28674	0.475943	-4.80466	1.55016e-06	0.000727799	k__Bacteria	p__Proteobacteria	c__Alphaproteobacteria	o__Sphingomonadales	f__Sphingomonadaceae	g__Kaistobacter	s__
OTU17	197.546	-2.46495	0.637071	-3.86919	0.000109197	0.00979428	k__Bacteria	p__Proteobacteria	c__Alphaproteobacteria	o__Sphingomonadales	f__Sphingomonadaceae	g__Kaistobacter	s__
OTU547	21.2522	-2.6837	0.681381	-3.93863	8.19492e-05	0.00942249	k__Bacteria	p__Proteobacteria	c__Alphaproteobacteria	o__Sphingomonadales	f__Sphingomonadaceae	g__Sphingomonas	s__wittichii
OTU440	21.6858	-2.90736	0.820776	-3.54221	0.000396793	0.0208735	k__Bacteria	p__Proteobacteria	c__Alphaproteobacteria	o__Sphingomonadales	f__Sphingomonadaceae	g__Kaistobacter	s__
OTU73	25.9639	-2.4109	0.71898	-3.35322	0.000798763	0.0357161	k__Bacteria	p__Proteobacteria	c__Alphaproteobacteria	o__Caulobacterales	f__Caulobacteraceae	g__Caulobacter
OTU399	10.3525	-5.22921	1.2551	-4.16638	3.09473e-05	0.00484326	k__Bacteria	p__Proteobacteria	c__Gammaproteobacteria	o__Pseudomonadales	f__Pseudomonadaceae	g__Pseudomonas	s__
OTU31	120.407	-3.36185	0.737195	-4.56033	5.10732e-06	0.00119894	k__Bacteria	p__Proteobacteria	c__Gammaproteobacteria	o__Pseudomonadales	f__Pseudomonadaceae	g__Pseudomonas
OTU603	8.69981	-3.31922	0.867508	-3.82615	0.000130161	0.0101851	k__Bacteria	p__Proteobacteria	c__Gammaproteobacteria	o__Xanthomonadales	f__Xanthomonadaceae	g__	s__
OTU156	38.584	-1.79471	0.458391	-3.91525	9.03114e-05	0.00942249	k__Bacteria	p__Proteobacteria	c__Gammaproteobacteria	o__Xanthomonadales	f__Xanthomonadaceae	g__	s__
OTU405	11.8835	-2.58639	0.718565	-3.59939	0.000318969	0.0200401	k__Bacteria	p__Actinobacteria	c__Actinobacteria	o__Actinomycetales	f__Actinosynnemataceae	g__	s__
Tillge effect (CT vs ST)
Bulk soil
Vegetative stage
Conventional tillage (CT): 0
Conservation tillage (ST): 1
	baseMean	log2FoldChange	lfcSE	stat	pvalue	padj	Kingdom	Phylum	Class	Order	Family	Genus
OTU354	21.6163	2.00153	0.450136	4.4465	8.72804e-06	0.0312289	k__Bacteria	p__Planctomycetes	c__Pla4	o__	f__	g__
Flowering stage
Conventional tillage (CT): 0													Species
Conservation tillage (ST): 0													s__
Harvesting stage
Conventional tillage (CT): 0
Conservation tillage (ST): 0

## Sheet: WS-10
Microhabitat zones effect (Bulk soil vs Rhizosphere)
Conservation tillage (ST)
Vegetative stage
Bulk soil: 0
Rhizosphere: 0
Flowering stage
Bulk soil: 0
Rhizosphere: 0
Harvesting stage
Rhizosphere: 1
	baseMean	log2FoldChange	lfcSE	stat	pvalue	padj	Kingdom	Phylum	Class	Order	Family	Genus	Species
OTU104	40.5668	1.75191	0.46335	3.78096	0.000156227	0.00913218	k__Bacteria	p__Chloroflexi	c__P2-11E	o__	f__	g__	s__
Bulk soil: 31
	baseMean	log2FoldChange	lfcSE	stat	pvalue	padj	Kingdom	Phylum	Class	Order	Family	Genus	Species
OTU477	6.25131	-3.25482	1.00566	-3.23649	0.0012101	0.0486307	k__Bacteria	p__TM7	c__TM7-3	o__EW055	f__	g__	s__
OTU256	48.0052	-2.27961	0.572218	-3.98381	6.78178e-05	0.0045902	k__Bacteria	p__Verrucomicrobia	c__Verrucomicrobiae	o__Verrucomicrobiales	f__Verrucomicrobiaceae	g__Luteolibacter	s__
OTU180	12.746	-3.58725	0.92101	-3.89491	9.82361e-05	0.00631658	k__Bacteria	p__Firmicutes	c__Bacilli	o__Bacillales	f__Bacillaceae	g__	s__
OTU299	20.0266	-3.79678	0.649863	-5.84244	5.14431e-09	1.58408e-06	k__Bacteria	p__Bacteroidetes	c__Cytophagia	o__Cytophagales	f__Cytophagaceae	g__Dyadobacter	s__
OTU789	9.50677	-4.30328	1.00808	-4.26878	1.96544e-05	0.00157972	k__Bacteria	p__Bacteroidetes	c__Cytophagia	o__Cytophagales	f__Cytophagaceae	g__Dyadobacter	s__
OTU2174	4.22189	-6.55864	1.88647	-3.47667	0.00050769	0.0233175	k__Bacteria	p__Bacteroidetes	c__Cytophagia	o__Cytophagales	f__Cytophagaceae	g__Hymenobacter	s__
OTU16	81.7166	-8.00204	1.02927	-7.77446	7.57675e-15	9.7437e-12	k__Bacteria	p__Bacteroidetes	c__Sphingobacteriia	o__Sphingobacteriales	f__Sphingobacteriaceae	g__Pedobacter	s__
OTU64	116.68	-5.99546	1.1427	-5.24676	1.548e-07	2.48841e-05	k__Bacteria	p__Bacteroidetes	c__Sphingobacteriia	o__Sphingobacteriales	f__Sphingobacteriaceae	g__Pedobacter	s__
OTU1379	7.8166	-6.25865	1.39992	-4.47072	7.79577e-06	0.000716097	k__Bacteria	p__Bacteroidetes	c__Sphingobacteriia	o__Sphingobacteriales	f__Sphingobacteriaceae	g__Pedobacter	s__
OTU2544	10.7762	-3.74652	0.798784	-4.69028	2.72825e-06	0.000292378	k__Bacteria	p__Bacteroidetes	c__Sphingobacteriia	o__Sphingobacteriales	f__Sphingobacteriaceae	g__Pedobacter	s__
OTU34	113.261	-3.35535	0.881149	-3.80793	0.000140135	0.00858161	k__Bacteria	p__Bacteroidetes	c__Flavobacteriia	o__Flavobacteriales	f__Flavobacteriaceae	g__Flavobacterium	s__succinicans
OTU75	96.6615	-4.4477	0.879867	-5.05497	4.30462e-07	5.53574e-05	k__Bacteria	p__Bacteroidetes	c__Flavobacteriia	o__Flavobacteriales	f__Flavobacteriaceae	g__Flavobacterium	s__
OTU14	191.553	-2.87119	0.817117	-3.5138	0.000441741	0.02104	k__Bacteria	p__Bacteroidetes	c__Flavobacteriia	o__Flavobacteriales	f__Flavobacteriaceae	g__Flavobacterium	s__
OTU284	14.1674	-7.86106	2.3921	-3.28627	0.00101525	0.0423212	k__Bacteria	p__Bacteroidetes	c__Flavobacteriia	o__Flavobacteriales	f__[Weeksellaceae]	g__Chryseobacterium	s__
OTU175	22.1423	-6.80475	1.84478	-3.68865	0.00022545	0.0120804	k__Bacteria	p__Bacteroidetes	c__Flavobacteriia	o__Flavobacteriales	f__[Weeksellaceae]	g__Chryseobacterium	s__
OTU6	233.513	-5.54217	0.786994	-7.04219	1.89237e-12	1.21679e-09	k__Bacteria	p__Proteobacteria	c__Alphaproteobacteria	o__Sphingomonadales	f__Sphingomonadaceae	g__Sphingomonas	s__
OTU29	271.208	-1.67977	0.418626	-4.01256	6.00629e-05	0.00429116	k__Bacteria	p__Proteobacteria	c__Alphaproteobacteria	o__Sphingomonadales	f__Sphingomonadaceae	g__	s__
OTU192	13.9228	-3.18257	0.889793	-3.57675	0.000347894	0.0172074	k__Bacteria	p__Proteobacteria	c__Alphaproteobacteria	o__Sphingomonadales	f__Sphingomonadaceae	g__Sphingopyxis	s__alaskensis
OTU547	21.2522	-2.38592	0.639049	-3.73354	0.000188805	0.0105567	k__Bacteria	p__Proteobacteria	c__Alphaproteobacteria	o__Sphingomonadales	f__Sphingomonadaceae	g__Sphingomonas	s__wittichii
OTU159	18.3243	-6.7405	1.67131	-4.03307	5.50527e-05	0.00416457	k__Bacteria	p__Proteobacteria	c__Alphaproteobacteria	o__Caulobacterales	f__Caulobacteraceae	g__	s__
OTU58	50.7444	-1.5171	0.441115	-3.43925	0.000583334	0.0258679	k__Bacteria	p__Proteobacteria	c__Alphaproteobacteria	o__Rhizobiales	f__Rhizobiaceae
OTU70	66.4053	-4.0007	0.722107	-5.54031	3.01938e-08	6.47154e-06	k__Bacteria	p__Proteobacteria	c__Alphaproteobacteria	o__Rhizobiales	f__Rhizobiaceae	g__Agrobacterium	s__
OTU265	14.2225	-4.63691	1.27132	-3.64732	0.000264988	0.013631	k__Bacteria	p__Proteobacteria	c__Alphaproteobacteria	o__Rhodobacterales	f__Rhodobacteraceae	g__Rhodobacter	s__
OTU157	34.1854	-6.62782	1.14029	-5.81238	6.15896e-09	1.58408e-06	k__Bacteria	p__Proteobacteria	c__Gammaproteobacteria	o__Pseudomonadales	f__Pseudomonadaceae	g__Pseudomonas	s__viridiflava
OTU31	120.407	-4.04524	0.733823	-5.51255	3.53668e-08	6.49739e-06	k__Bacteria	p__Proteobacteria	c__Gammaproteobacteria	o__Pseudomonadales	f__Pseudomonadaceae	g__Pseudomonas
OTU678	5.85869	-3.42358	1.04222	-3.2849	0.00102018	0.0423212	k__Bacteria	p__Proteobacteria	c__Gammaproteobacteria	o__Xanthomonadales	f__Xanthomonadaceae	g__	s__
OTU212	37.7362	-2.12473	0.477579	-4.44897	8.62838e-06	0.00073974	k__Bacteria	p__Proteobacteria	c__Betaproteobacteria	o__Burkholderiales	f__Comamonadaceae	g__	s__
OTU47	56.7084	-3.19381	0.68917	-4.63428	3.58187e-06	0.000354329	k__Bacteria	p__Actinobacteria	c__Actinobacteria	o__Actinomycetales	f__Nocardiaceae	g__Rhodococcus	s__fascians
OTU3	376.707	-2.15333	0.343147	-6.27525	3.49071e-10	1.49635e-07	k__Bacteria	p__Actinobacteria	c__Actinobacteria	o__Actinomycetales	f__Micrococcaceae	g__	s__
OTU2516	12.0631	-3.839	0.809228	-4.74402	2.09515e-06	0.000244942	k__Bacteria	p__Actinobacteria	c__Actinobacteria	o__Actinomycetales	f__Microbacteriaceae
OTU232	86.8784	-2.30754	0.441882	-5.22206	1.76944e-07	2.52833e-05	k__Bacteria	p__Actinobacteria	c__Actinobacteria	o__Actinomycetales	f__Microbacteriaceae	g__	s__
Microhabitat zones effect (Bulk soil vs Rhizosphere)
Conventional tillage (CT)
Vegetative stage
Bulk soil: 0
Rhizosphere: 0
Flowering stage
Bulk soil: 0
Rhizosphere: 0
Harvesting stage
Bulk soil: 1
	baseMean	log2FoldChange	lfcSE	stat	pvalue	padj	Kingdom	Phylum	Class	Order	Family	Genus	Species
OTU16	81.7166	-4.35765	1.0019	-4.34936	1.36533e-05	0.0488514	k__Bacteria	p__Bacteroidetes	c__Sphingobacteriia	o__Sphingobacteriales	f__Sphingobacteriaceae	g__Pedobacter	s__
Rhizosphere: 0

[truncated: 2 more sheets: WS-11, WS-12]
